1                    **Neutrophils encompass a regulatory subset suppressing T cells**  
2                    **in apparently healthy cattle and mice**

3  
4  
5 Marion Rambault<sup>1,2\*</sup>, Émilie Doz-Deblauwe<sup>1\*</sup>, Yves Le Vern<sup>1</sup>, Florence Carreras<sup>1</sup>, Patricia  
6 Cunha<sup>1</sup>, Pierre Germon<sup>1</sup>, Pascal Rainard<sup>1</sup>, Nathalie Winter<sup>1§</sup> and Aude Remot<sup>1§</sup>

7 <sup>1</sup> INRAE, Université de Tours, ISP, 37380 Nouzilly, France

8 <sup>2</sup> Institut de l'Elevage, Paris, France

9  
10 \*Both authors contributed equally

11 §Both authors contributed equally. Correspondence should be addressed to NW  
12 ([nathalie.winter@inrae.fr](mailto:nathalie.winter@inrae.fr)) or AR ([aude.remot@inrae.fr](mailto:aude.remot@inrae.fr))

13  
14  
15  
16 **KEY WORDS** Neutrophil, Regulation, Cattle, T-cell, Suppression, Subset

17

## 18 **ABSTRACT**

19 Neutrophils that reside in the bone marrow are swiftly recruited from circulating blood to fight  
20 infections. For a long time, these first line defenders were considered as microbe killers.  
21 However their role is far more complex as cross talk with T cells or dendritic cells have been  
22 described for human or mouse neutrophils. In cattle, these new roles are not documented yet.  
23 We identified a new subset of regulatory neutrophils that is present in the mouse bone marrow  
24 or circulate in cattle blood under steady state conditions. These regulatory neutrophils that  
25 display MHC-II on the surface are morphologically indistinguishable from classical MHC-II<sup>neg</sup>  
26 neutrophils. However MHC-II<sup>pos</sup> and MHC-II<sup>neg</sup> neutrophils display distinct transcriptomic  
27 profiles. While MHC-II<sup>neg</sup> and MHC-II<sup>pos</sup> neutrophils display similar bacterial phagocytosis or  
28 killing activity, MHC-II<sup>pos</sup> only are able to suppress T cell proliferation under contact-dependent  
29 mechanisms. Regulatory neutrophils are highly enriched in lymphoid organs as compared to  
30 their MHC-II<sup>neg</sup> counterparts and in the mouse they express PDL-1, an immune checkpoint  
31 involved in T-cell blockade. Our results emphasize neutrophils as true partners of the adaptive  
32 immune response, including in domestic species. They open the way for discovery of new  
33 biomarkers and therapeutic interventions to better control cattle diseases.

34

## 35 **INTRODUCTION**

36 Neutrophils are major partners of the innate immune system and are considered the first line  
37 of defense against microbes[1]. They originate from the bone marrow (BM) and circulate in  
38 large numbers in the blood from where they are swiftly recruited to sites of inflammation or  
39 infection to fight danger. They are functionally equipped to rapidly phagocytose invading  
40 microbes via a variety of receptors[2] and rapidly deliver large amounts of Reactive Oxygen  
41 Species (ROS) into phagocytic vacuoles to kill microbes[3]. If not tightly controlled these  
42 dangerous weapons lead to tissue damage and neutrophils are often a signature of  
43 uncontrolled inflammation or infection.

44 Neutrophils are the dominant cell population circulating in blood in a wide range of animal  
45 species and humans[4]. However, in cattle or mouse blood they are less numerous than  
46 lymphocytes[5; 6]. Compared to human or mouse neutrophils, bovine neutrophils present  
47 peculiarities such as unique receptors or the lack of N-formylated chemotactic peptide  
48 receptor[5]. Neutrophil counts are an important signature of cattle condition. In lactating cows,  
49 they represent the most part of an abnormal somatic cell count in milk from mastitic cows.  
50 Indeed, their swift recruitment into the mammary gland is of critical importance in the fight  
51 against invasive pathogens[7]. For a long time, neutrophils were thought to only travel from  
52 their birth place, the BM, to blood and tissues in response to inflammatory signals or infections.  
53 However, this has recently been revisited by a number of authors who have identified  
54 neutrophils residing in spleen[8; 9], lymph nodes[10] or lung vasculature[11]. These new

55 locations and features of resident neutrophils have been discovered in mice and humans but  
56 are not well documented in other animal species, including cattle, under normal conditions.  
57 Long considered as “suicide bombers”, neutrophils were recently upgraded as global players  
58 of the immune response along with the discovery of new functions[12]. They fully participate  
59 in shaping adaptive immunity by suppressing T cell proliferation and activity[13; 14] or by  
60 promoting IgM and IgG production by splenic B cells[9]. This broad range of phenotypes and  
61 functions was recently linked to discrete populations of neutrophils characterized by unbiased  
62 single cell analyses[15]. Like macrophages and dendritic cells, neutrophils are now recognized  
63 as plastic cells able to respond and adapt to their environment. Again, although neutrophil  
64 diversity and plasticity are now well documented for mouse and human neutrophils, they  
65 remain unknown for domestic species including cattle.  
66 Here we conducted a parallel thorough characterization of neutrophils present in mouse BM  
67 or circulating in cattle blood at steady state. We define this term as animals without any  
68 apparent sign of disease or infection. In other words, animals where the immune system is at  
69 homeostasis. We discovered a new population of regulatory neutrophils that displayed  
70 suppressive activity on T-cells, at steady state.

71

## 72 **MATERIALS AND METHODS**

### 73 **Animal protocols and sampling**

74 Experimental protocols complied with French law (Décret: 2001–464 29/05/01) and European  
75 directive 2010/63/UE for the care and use of laboratory animals and were carried out under  
76 Authorization for Experimentation on Laboratory Animals Number D-37-175-3 (Animal facility  
77 UE-PFIE, INRA Centre Val de Loire for mice) and E 37-175-2 (UE-PAO, INRAE Centre Val de  
78 Loire for bovine). Animal protocols were approved by the “Val de Loire” Ethics Committee for  
79 Animal Experimentation and were registered to the French National Committee for Animal  
80 Experimentation under N°2016091610026164.V3 (mice) or N°2016040410531486 (cattle).  
81 Cattle remained in their environment (UE-PAO) and no animal was sacrificed for this work.  
82 Six- to eight-week-old C57BL/6 mice and OT-II transgenic mice for the OVA MHC class II  
83 complex-specific TCR[16] on a C57BL/6 genetic background were bred at the resident PFIE  
84 animal facility before use.

85 Bovine blood was collected from Holstein Friesian cows at the jugular vein into vacutainer K2  
86 EDTA tubes. Broncho-tracheal lymph nodes, spleen biopsy and sternum BM were collected  
87 post-mortem at a commercial abattoir from Blonde d'Aquitaine, Limousine, Charolaise and  
88 Highlands cows. Mice were euthanized by CO<sub>2</sub> inhalation. Blood (from heart), spleen, inguinal  
89 lymph nodes and femurs were collected.

90

### 91 **Preparation of cells**

92 Tubes containing blood were centrifuged at 1000xg for 10 min at 20°C before removal of the  
93 plasma layer and buffy coat. In indicated experiments, buffy coat was used in proliferation  
94 assay (see below). Red Blood Lysis Buffer (Sigma 94 R7757) (4 vol/1 vol of blood) was added  
95 for 5 min at room temperature to lyse red blood cells. Cells were washed twice in D-PBS with  
96 2mM EDTA. Mouse neutrophils were generally purified from the BM by positive magnetic  
97 selection with anti-Ly-6G PE-conjugated Ab (1A8; BD Biosciences) and anti-PE microbeads  
98 (Miltenyi Biotec) as described previously[17] except for cell sorting, where mouse neutrophils  
99 were enriched from BM by positive magnetic selection with anti-CD11b microbeads (Miltenyi  
100 Biotec) before labelling with antibodies. Lymph nodes (LN) and spleen biopsies were disrupted  
101 mechanically and cells were filtered through 100µm nylon cell strainer (BD Falcon), and  
102 washed twice. Cells were suspended in RPMI-1640 supplemented with 2mM L-Glutamine,  
103 10mM HEPES and 1mg/mL of BSA with extremely low endotoxin level ( $\leq 1.0$  EU/mg) (hereafter  
104 referred to as RPMI complete medium). Cell counts were determined after staining with Türk  
105 solution and numerated with a Malassez's chamber.

106

### 107 **Flow cytometry**

108 Bovine cells were suspended in PBS with 10% of horse serum (Gibco), 2mM EDTA and  
109 labeled for 30 min with primary antibodies (see Supplementary Table S1). Mouse cells were  
110 suspended in PBS 2mM EDTA. After saturation with anti-CD32/CD16, cells were incubated  
111 30min with fluorescent mAb. After washes in D-PBS (300xg, 10 min, 4°C), cells were labeled  
112 30min with the corresponding fluorescent-conjugated secondary antibodies. Bovine cells were  
113 washed and fixed with BD cell Fix diluted 4 times in PBS. Data were acquired with a LSR  
114 Fortessa™ X-20 Flow cytometer (Becton Dickinson) and results analyzed with Kaluza software  
115 (Beckman Coulter).

116 For neutrophil subsets purification, cell concentrations were adjusted to  $10^7$  cells/mL and sorted  
117 with a MoFlo Astrios<sup>EQ</sup> high speed cell sorter (Beckman Coulter) according to our previously  
118 published protocol [18]. Sorted cells were spread on microscope slides (Superfrost, Thermo)  
119 by cytocentrifugation (3 min, 700xg) and stained with May-Grünwald and Giemsa with the RAL  
120 555 kit (RAL diagnostics).

121

### 122 **Neutrophils functional tests**

123 Sorted neutrophils viability was evaluated after 1 h stimulation with 100ng/mL of LPS (*E.coli*  
124 0111:B4, Sigma). Neutrophils were then incubated 15min at room temperature with anti-  
125 annexinV antibodies in binding buffer (BD Bioscience). Cells were washed and incubated  
126 15min at room temperature with streptavidin-APC-Cy7 (BD Bioscience). Cells were washed  
127 and incubated 5 min with 20µg/mL of propidium iodide (BD Bioscience) and then directly  
128 analyzed with LSR Fortessa X-20 flow cytometer. Phagocytosis was measured using

129 pHrodo™ Red *E. coli* BioParticles® Conjugated (MolecularProbes®) following the  
130 manufacturer's instructions. Briefly, purified neutrophils were first incubated in a 96 wells  
131 microplate for 30 min at 37°C in RPMI complete medium with or without 2µg/well of  
132 cytochalasin D (Sigma), and then for 1 h with 20µg/wells of pHrodo *E. coli* BioParticles.  
133 Fluorescence was directly measured with the LSR Fortessa™ X-20 Flow cytometer. ROS  
134 produced by neutrophils were quantified using the CellROX® Orange Flow Cytometry Assay  
135 Kits (MolecularProbes®, C10493) following the manufacturer's instructions. Briefly, purified  
136 neutrophils were first incubated for 1 h at 37°C in RPMI complete medium with or without  
137 400µM of TBHP in a 96-wells black microplate and then for 30 min with 100nM CellROX®.  
138 Fluorescence was measured with the LSR Fortessa™ X-20 Flow cytometer. To test the  
139 bacterial killing capacity of neutrophils, we used the *Escherichia coli* P4 strain, isolated from a  
140 clinical case of bovine mastitis which causes severe infections in mice[19]. *E. coli* P4 bacteria  
141 were grown in 10 mL BHI medium overnight at 37°C without agitation. Bacteria were then  
142 diluted in BHI medium (1 vol/100 vol) and incubated for 6 h at 37°C without agitation. Bacterial  
143 concentration was determined by the optical density at 600 nm and adjusted at  $4 \cdot 10^5$  CFU/mL  
144 in RPMI complete medium. Purified neutrophils were infected at a MOI of 0.2 in RPMI complete  
145 medium in 1.5mL Eppendorf tubes for 90 min at 37°C under agitation on a Rotator SB3 (Stuart  
146 equipment). Bacteria in RPMI complete medium without neutrophils were used as the  
147 reference to asses killing. Bacterial dilutions (in PBS 0.25% SDS) were plated on TSA agar  
148 plates and incubated for 16 h at 37°C before numeration of CFUs.

149

### 150 **RNA extraction and gene expression analysis**

151 Total RNAs were extracted from cell-sorter purified cells using NucleoSpin RNA kit with a  
152 DNase treatment (Macherey Nagel) and reverse transcribed with iScript™ Reverse  
153 Transcriptase mix (Biorad) according to the manufacturer's instructions. Primers  
154 (Eurogenetec) are listed in Supplementary Table S2. Primers validation was performed on a  
155 serial diluted pool of cDNA (a mix of cDNA from spleen, lung, LN, blood and BM cells for both  
156 species) with a LightCycler® 480 Real-Time PCR System (Roche). Gene expression was then  
157 assessed with the BioMark HD (Fluidigm) in a 48x48 wells plate, according to the  
158 manufacturer's instructions. The annealing temperature was 60 and 62°C for bovine and  
159 mouse samples respectively. Data were analyzed with Fluidigm RealTime PCR software to  
160 determine the cycle threshold (Ct) values. Messenger RNA (mRNA) expression was  
161 normalized to the mean expression of three housekeeping genes for each animal species to  
162 obtain the  $\Delta$ Ct value. Principal Component Analysis (PCA) and hierarchical clustering were  
163 performed with  $\Delta$ Ct values in R studio (Version 1.3.959, © 2009-2020 RStudio, PBC), using  
164 respectively the FactoMineR and pheatmap packages. Ward's minimum variance method was

165 applied for clustering, with dissimilarities squared before clustering (ward.D2).  $\Delta$ Ct values were  
166 centered to the median for clustering.

167

### 168 **Measure of T-cell suppressive activity of neutrophils**

169 For the mouse, splenocytes from OT-II mice were collected, homogenized to single-cell  
170 suspensions through nylon screens and resuspended in RPMI medium (Gibco) supplemented  
171 with 10% decompemented fetal bovine serum (Gibco), 2 mM L-glutamine (Gibco), 100 U  
172 penicillin and 100  $\mu$ g/ml streptomycin (Gibco).  $10^5$  cells/well were distributed in a 96-wells  
173 round bottom plate (BD Falcon). OT-II splenocytes proliferation was induced by addition of 2  
174  $\mu$ g/ml of the OVA peptide 323-339 (Polypeptide Group). As indicated, purified neutrophils were  
175 added to the culture at a ratio of 1 neutrophil:10 splenocytes in a final volume of 200 $\mu$ L. Wells  
176 without neutrophils were used as reference for maximal proliferation.

177 As indicated, neutrophils were separated from splenocytes by placing them in a HTS  
178 Transwell-96 permeable device with 0.4  $\mu$ m pore and polycarbonate membrane and adapted  
179 receiver plate (Corning, reference CLS3381). To test the role of MHC-II and CD11b molecules  
180 in the suppression mechanism, neutrophils were also treated 1 h before incubation with  
181 splenocytes with 15 $\mu$ g/mL anti-CD11b mAb (clone M1/70) or rat IgG2bk as isotype control ;  
182 anti MHC-II mAb (clone 2G9) or rat IgG2ak as isotype control. Plates were incubated at 37°C  
183 with 5%CO<sub>2</sub>. Cell proliferation was quantified after 3 days of culture using CyQUANT Cell  
184 Proliferation Assay tests (ThermoFisher) according to the manufacturers' instructions.

185 For the bovine, a Mixed Lymphocyte Reaction assay was set up by mixing blood cells from  
186 two genetically distant cows with cow N°1 as the responding animal and cow N°2 as the  
187 stimulating animal. Briefly, blood was centrifuged at 1000xg, 15min, 20°C and buffy coats were  
188 collected and diluted 4 times in PBS. PBMCs were collected at the interface of 1.077 density  
189 Percoll gradient (GE Healthcare) after centrifugation at 400g, 15min, 20°C, without brake.  
190 PBMCs from cow n°1 (responding) remained untreated while PBMCs from cow n°2  
191 (stimulating) were incubated for 30 min at 38.5°C in 5% CO<sub>2</sub> with 50 $\mu$ g/mL of mitomycin C  
192 from *Streptomyces caespitosus* (Sigma, M4287), to block their proliferation. After three  
193 washes,  $10^5$  stimulating cells were mixed with  $10^5$  responding cells in 96 wells plates (ratio 1:1)  
194 in a total volume of 150 $\mu$ L in RPMI complete medium supplemented with 100U/mL penicillin  
195 and 100 $\mu$ g/ml streptomycin. The negative control was responding cells alone and the  
196 reference maximal proliferation was responding and simulating cells together at ratio 1:1.  
197 Proliferation that started at day 6 was stopped at day 9. As indicated, at day 4,  $10^5$  of purified  
198 syngenic neutrophils from the responding animal were added to the well in a final volume of  
199 200  $\mu$ L. In one experiment, neutrophils were placed in a HTS Transwell-96 permeable device  
200 as for the mouse system. To quantify proliferation, plates were centrifuged at day 6 and day 9  
201 for 5 min at 300xg, supernatants were discarded and cells were frozen at -80°C before addition



202 of reagents from the CyQUANT Cell Proliferation Assay kit (ThermoFisher) as indicated by the  
203 manufacturer.

204

## 205 **Statistical analysis**

206 Individual data and the median were presented in the Figures. Statistical analyses were  
207 performed with Prism 6.0 software (GraphPad). Analyzes were performed on data from 2 to 6  
208 independent experiments, Mann Whitney non-parametric tests or 2way ANOVA test were  
209 used. Represented p-values were: \* $p < 0.05$ ; \*\* $p < 0.01$ , and \*\*\* $p < 0.001$ .

210

## 211 **SUPPLEMENTARY INFORMATION**

212 Supplemental information can be found with this article online. Should the reader need  
213 additional details, please email a request to corresponding authors.

214

## 215 **RESULTS**

### 216 **Neutrophils represent discrete populations in mouse and cattle**

217 In cattle, neutrophils are often isolated by simple centrifugation of freshly collected blood to  
218 separate them from the buffy coat. They segregate at the bottom of the tube with red blood  
219 cells[20; 21]. In mice, because of very small volumes, blood sampling is less practical.  
220 Therefore, high numbers of neutrophils are directly extracted from the BM by magnetic  
221 selection following labelling with antibody against Ly-6G which is highly expressed by mouse  
222 neutrophils[22]. These methods, that lead to a fair level of purity for neutrophils, are convenient  
223 for most assays because they are quick and preserve these fragile cells. We prepared cattle  
224 and mouse neutrophils using these rapid procedures and analyzed them by flow cytometry  
225 (Fig. 1). Following mouse bone-marrow cell preparation and labeling with anti-Ly-6G and  
226 magnetic separation (Fig. 1A), banded-cells of apparent homogeneity were observed after  
227 May-Grümwald-Giemsa (MGG) staining (Fig. 1B). However, the SSC and FSC profile by flow  
228 cytometry displayed two discrete populations of heterogeneous size. Moreover, double  
229 labelling of these “pure” neutrophils with anti-Ly-6G and anti-CD11b distinguished CD11b<sup>hi</sup>  
230 from CD11b<sup>med</sup> cell populations (Fig. 1C). In cattle, after elimination of the buffy coat containing  
231 PBMCs, cells were collected from lower 2/3 of the tube (Fig. 1D) and analyzed after  
232 centrifugation and MGG staining. This revealed heterogeneity of this cell fraction with the  
233 presence of eosinophils in variable proportions (Fig. 1E). After labelling with anti G1, a marker  
234 that is highly expressed on the surface of bovine neutrophils[23; 24] and anti CD11b, cells  
235 were analyzed by flow cytometry. After SSC and FSC gating on the granulocytes populations  
236 (Fig. 1F), we distinguished CD11b<sup>pos</sup> G1<sup>low</sup> eosinophils (representing between 2 and 8% of the  
237 SSC x FSC granulocyte gate depending on the animal) from G1<sup>hi</sup> neutrophils. Among G1<sup>hi</sup>  
238 neutrophils CD11b labelling segregated two populations: a main population of CD11b<sup>med</sup>

239 neutrophils (around 87% of the granulocyte gate) and a minor population (around 1,5%) of  
240 CD11b<sup>hi</sup> neutrophils (Fig. 1F).

241 As we were intrigued by the presence of different neutrophil populations in mouse BM and  
242 cattle blood at steady state, we performed a more thorough characterization by flow cytometry  
243 using a panel of markers (Fig. 2). In mouse, CD11b was used to gate myeloid cells (Fig. 2A)  
244 and a combination of anti-Ly-6C and anti-Ly-6G allowed us to distinguish *bona-fide* neutrophils  
245 (Ly-6G<sup>hi</sup>) from monocytes (Ly-6G<sup>neg</sup>)[25]. Among Ly-6C<sup>+</sup> Ly-6G<sup>hi</sup> cells, a minor subset (1,2%)  
246 of MHC-II<sup>pos</sup> Ly-6C<sup>+</sup> Ly-6G<sup>hi</sup> neutrophils was clearly distinguished from the main population  
247 (92,5%) of the MHC-II<sup>neg</sup> neutrophils. In cattle, among the neutrophils that highly expressed  
248 the G1 marker, MHC-II<sup>neg</sup> neutrophils represented the main population (93%). However, a  
249 minor population of G1<sup>hi</sup> neutrophils (around 1,5%) expressed MHC-II antigens on the surface  
250 as observed in the mouse (Fig. 2A). The two MHC<sup>neg</sup> et MHC<sup>pos</sup> subsets were sorted by flow  
251 cytometry in both species. After centrifugation onto glass slides and MGG staining, they were  
252 indistinguishable under a microscope (Fig. 2B). Sorted MHC-II<sup>neg</sup> and MHC-II<sup>pos</sup> neutrophils  
253 were then labelled with a panel of antibodies (Fig. 2C). In both bovine and mouse, in  
254 comparison with classical MCH-II<sup>neg</sup> neutrophils, the MHC-II<sup>pos</sup> subset overexpressed CD11b  
255 on the surface as well as L-selectin CD62L. The CD14 LPS coreceptor was not detected on  
256 MHC-II<sup>neg</sup> neutrophils. By contrast around 50% of MHC-II<sup>pos</sup> neutrophils displayed this receptor  
257 on their surface in both the mouse and the bovine. In mouse, we also observed that the MHC-  
258 II<sup>pos</sup> subset expressed high levels of CD44 as well as CD274 (PDL-1) the ligand for PD-1  
259 involved in T cell exhaustion[26]. Since neutrophils are fragile cells which could be exacerbated  
260 by flow cytometry sorting, we next asked if the two subsets displayed different *ex-vivo* survival  
261 times. The two subsets were incubated with LPS for 1 hour and stained with annexin V and  
262 propidium iodide (Fig. 2D). The large majority of neutrophils remained alive after this treatment  
263 and no significant difference was observed between classical MHC-II<sup>neg</sup> neutrophils (97% alive  
264 in mouse or bovine) and MHC-II<sup>pos</sup> neutrophils (95% alive in mouse or bovine).  
265 Therefore, in mouse BM or in cattle blood, two subsets of neutrophils could be distinguished  
266 at steady state by MHC-II labelling. Both subsets displayed similar apoptosis and death profiles  
267 *ex-vivo* after LPS stimulation.

268

### 269 **MHC-II<sup>pos</sup> neutrophils are enriched in lymphoid organs**

270 Although neutrophils are mostly present in the BM reservoir and in circulating blood, recent  
271 data in the mouse model and in humans highlighted their wider distribution in tissues[27]  
272 including lymphoid organs. We next examined the distribution of MHC-II<sup>neg</sup> versus MHC-II<sup>pos</sup>  
273 neutrophils in different compartments in both mouse and cattle. Cells were extracted and  
274 prepared from BM, lymph nodes (LN, inguinal in the mouse and tracheobronchial in bovine)  
275 and spleen. For analysis of circulating neutrophils, total blood leukocytes were analyzed by



276 flow cytometry (see Supplemental Fig. S1 for gating strategy) after lysis of red cells. In the BM,  
277 neutrophils represented around 30% of total leukocytes in both species (Fig. 3A). This was  
278 expected since BM is the principal compartment hosting neutrophils. In blood, neutrophils  
279 represented 30% or 20 % of total cells in mouse and cattle, respectively. In both the mouse  
280 and the bovine LN, even though neutrophils represented less than 1% of cells at steady state,  
281 they were consistently detected. Similarly, between 2 and 3% of cells collected from mouse or  
282 bovine spleen after lysis of red blood cells were neutrophils (Fig. 3A). In all analyzed  
283 compartments classical neutrophils as well as MHC-II<sup>pos</sup> neutrophils were detected (Fig. 3B).  
284 Interestingly, whereas MHC-II<sup>pos</sup> neutrophils represented only  $2,4 \pm 0,6$  % or  $4,6 \pm 1,4$  % of  
285 total neutrophils in the mouse bone-marrow or cattle blood, respectively, they represented  
286 around 40% or 60% of total neutrophils in mouse or bovine lymph nodes, respectively. In  
287 spleen, around 20% of total mouse neutrophils and 30% of bovine were MHC-II<sup>pos</sup> (Fig. 3B).  
288 Therefore MHC-II<sup>pos</sup> neutrophils were highly enriched in lymphoid organs in both species, at  
289 steady state.

290

### 291 **RNA profiling distinguishes classical from MHC-II<sup>pos</sup> neutrophils in both the mouse and** 292 **the bovine**

293 To analyze the transcriptional profile of MHC-II<sup>pos</sup> and MHC-II<sup>neg</sup> neutrophils, we sorted the two  
294 populations from either BM (mouse) or blood (cattle) to more than 99% purity and performed  
295 a transcriptomic profiling using 48 validated primer pairs (Table S1) designed to cover a large  
296 set of neutrophils functions such as synthesis of cytokines or chemokines, enzymes stored in  
297 granules, surface receptors, as well as transcription factors. Some weakly expressed genes  
298 were removed from the panel (highlighted in Table S1). We then performed unsupervised  
299 Principal Component Analysis (PCA) and observed that the different subsets were significantly  
300 discriminated (Fig. 4A). The first axis of the PCA (explaining 26.4% of the variance) separated  
301 bovine and mouse samples, as expected. The second axis (explaining 19.1% of the variance)  
302 clearly separated the MHC-II<sup>pos</sup> from the MHC-II<sup>neg</sup> neutrophils in each species (Fig. 4A),  
303 indicating that they belonged to different subsets. As expected, in the bovine, gene expression  
304 profiles were more dispersed than in the inbred mouse, due to inter-individual variability. In  
305 both species, the two neutrophil subsets were also segregated by hierarchical clustering based  
306 on  $\Delta$ CT values (Fig. 4B). Most of the genes were significantly less expressed in MHC-II<sup>pos</sup>  
307 neutrophils as compared to MHC-II<sup>neg</sup>. However, expression of the following genes was  
308 significantly higher in the MHC-II<sup>pos</sup> subset: *elane*, *proteinase3*, *PD-L1* in murine and *MHC-II*;  
309 *AHR* in bovine cells. A trend for higher expression was observed in MHC-II<sup>pos</sup> neutrophils for  
310 *CD14* (both species) and *proteinase3* (bovine). Therefore, in both species the transcriptomic  
311 signature significantly differed between the two neutrophil subsets which suggested different  
312 biological roles.

313

314 **MHC-II<sup>pos</sup> neutrophils produce higher levels of ROS than MHC-II<sup>neg</sup> but similarly**  
315 **phagocytose bioparticles and kill bacteria**

316 In order to gain further insight into the functions of the two neutrophil populations, we first  
317 compared their phagocytic ability using conjugated pHrodo™ Red *E. coli* BioParticles™ that  
318 only fluoresce once inside the phagosome or endosome of the cell[28]. Neutrophils were then  
319 analyzed by flow cytometry and the percentage of phagocytosis was directly correlated with  
320 the mean fluorescence intensity (see supplementary Fig. S2). Phagocytosis by MHC-II<sup>neg</sup> or  
321 MHC-II<sup>pos</sup> neutrophils was compared in individual animals from each species. Both subsets  
322 actively phagocytosed bioparticles which was dramatically reduced by treatment with  
323 cytochalasin D (Fig. 5A). We did not detect a significant difference in phagocytosis between  
324 MHC-II<sup>neg</sup> and MHC-II<sup>pos</sup> neutrophils neither in the mouse nor the bovine (Fig. 5A). We next  
325 measured their potential for total ROS production after incubation with the non-specific  
326 chemical inducer *tert-butyl hydroperoxide* (TBHP) using the fluorescent probe CellROX that  
327 fluoresces when oxidized (see supplementary Fig. S2 for gating strategy). Mouse bone-  
328 marrow neutrophils incubated with medium produced very low levels of ROS whereas bovine  
329 blood neutrophils produced higher levels (Fig. 5B). As expected, TBHP treatment dramatically  
330 increased ROS production by both MHC-II<sup>neg</sup> and MHC-II<sup>pos</sup> neutrophils in both species.  
331 However, in both conditions and for both species, MHC-II<sup>pos</sup> neutrophils produced significantly  
332 more ROS than MHC-II<sup>neg</sup> cells (Fig. 5B). We next analyzed the killing activity, under non  
333 opsonic conditions, of the two subsets against the *Escherichia coli* P4 strain isolated from a  
334 case of bovine clinical mastitis[19]. Both types of neutrophils efficiently killed *E. coli* and no  
335 significant difference was observed between MHC-II<sup>neg</sup> or MHC-II<sup>pos</sup> neutrophils (Fig. 5C).

336

337 **MHC-II<sup>pos</sup> but not MHC-II<sup>neg</sup> neutrophils exert contact-dependent suppression of T cells**  
338 **at steady state**

339 We wondered if surface proteins such as MHC-II (mouse and cattle) or PDL-1 (mouse) or  
340 enrichment of MHC-II<sup>pos</sup> neutrophils in lymphoid organs could be linked to regulatory functions  
341 on T cells. To address this, we set up *in vitro* assays that were either antigen specific in the  
342 mouse (Fig. 6A) or polyclonal in cattle (Fig. 6C). Using the OT-II transgenic mice that bear the  
343 OVA peptide 323-339 - MHC class II complex-specific TCR[16] we observed strong  
344 proliferation of splenocytes when stimulated with OVA peptide for 72 hours. Taking this  
345 condition as the maximum proliferation (100%) we compared the impact of adding MHC-II<sup>neg</sup>  
346 and MHC-II<sup>pos</sup> neutrophils to the proliferating cells (ratio 10 splenocytes:1 neutrophil). The  
347 classical MHC-II<sup>neg</sup> neutrophils had no measurable effect on OT-II splenocytes proliferation  
348 (Fig. 6B). By contrast, addition of MHC-II<sup>pos</sup> neutrophils purified either from mouse BM or blood,  
349 decreased the capacity of CD4 OT-II cells to proliferate by  $66 \pm 3$  % (Fig. 6B). The suppressive

350 activity of mouse MHC-II<sup>pos</sup> neutrophils depended on contact with the proliferating T-cells as  
351 no effect was observed when cells were separated by a Transwell device (Fig. 6B). We then  
352 used blocking antibodies in order to define if MHC-II or CD11b, that are both highly expressed  
353 on the surface of MHC-II<sup>pos</sup> neutrophils, were involved in this suppressive activity. Both anti-  
354 MHC-II and anti-CD11b partially relieved suppression by MHC-II<sup>pos</sup> neutrophils that reached  
355  $70 \pm 7$  and  $75 \pm 1\%$  of total proliferation respectively (Fig. 6B). This indicated that both  
356 molecules were involved in the suppression mechanism although they were probably not the  
357 only ones.

358 In cattle, we set up a Mixed-Leukocyte-Reaction (MLR) by mixing PBMCs from a responder  
359 animal with mitomycin-C treated PBMCs from a genetically unmatched animal as stimulating  
360 cells (ratio 1:1) for a total of 9 days. After initial decline of total DNA content during 6 days due  
361 to cells dying in the wells, proliferation of T-cells from the responder animal was measured by  
362 an increase of the DNA content at day 9 in the control wells, correlating with polyclonal  
363 activation of T-cells (Fig. S3). Level of proliferation obtained under these control conditions  
364 was set as 100% (Fig. 6D). Addition of classical MHC-II<sup>neg</sup> bovine neutrophils to the PBMCs  
365 (ratio 1:1) from the responder animal did not change the proliferative capacity. By contrast,  
366 addition of MHC-II<sup>pos</sup> neutrophils from the responder animal to PBMCs (ratio 1:1) strongly  
367 suppressed T-cells as the proliferation was completely inhibited for 3 animals, and only 16%  
368 of proliferation remained for 1 animal, as compared to control wells (Fig. 6D). In one experiment  
369 we could separate MHC-II<sup>pos</sup> neutrophils from the proliferating PBMCs in a transwell device  
370 and observed that suppression was abolished, indicating that the suppressive activity of MHC-  
371 II<sup>pos</sup> neutrophils was contact-dependent as in the mouse (Fig 6D). Therefore, both in the mouse  
372 and the bovine, a subset of MHC-II<sup>pos</sup> neutrophils can be distinguished from classical  
373 neutrophils as displaying suppressive activity on T-cells at steady state.

374

## 375 **DISCUSSION**

376 We reported here that a population of MHC-II<sup>pos</sup> neutrophils was present in the BM reservoir,  
377 circulated in blood and was enriched in lymphoid organs, in the apparently healthy bovine and  
378 mouse. Both MHC-II<sup>pos</sup> and MHC-II<sup>neg</sup> neutrophils displayed the polylobed nucleus, and were  
379 undistinguishable by this gold standard of neutrophils characterization[14]. Similar to classical  
380 MHC-II<sup>neg</sup> neutrophils, the MHC-II<sup>pos</sup> subset displayed important functions of neutrophils such  
381 as ROS production, phagocytosis and bacterial killing. However, unlike classical MHC-II<sup>neg</sup>  
382 neutrophils, the MHC-II<sup>pos</sup> neutrophils were able to suppress T-cells, a function that is reported  
383 here for the first time for bovine neutrophils. Heterogeneity or plasticity of neutrophils has  
384 largely emerged in the literature in humans or mice and new models of neutrophil differential  
385 development are proposed[15]. Here, mouse and bovine MHC-II<sup>pos</sup> suppressive neutrophils  
386 were detected in the BM reservoir. They were the only ones to exert suppressive activity on T

387 cells. They displayed a clearly distinct transcriptomic profile as compared to MHC-II<sup>neg</sup>  
388 neutrophils. They were also highly enriched in lymphoid organs. Thus, they may represent a  
389 distinct subset, produced in the BM for rapid mobilization and regulation of T cells. On the other  
390 hand, CD11b upregulation that was observed on these neutrophils could also sign an activated  
391 state[29]. Recently, CD11b<sup>hi</sup> primed neutrophils were also reported to circulate in blood in  
392 healthy mice and humans to quickly respond to danger[30]. Neutrophils from healthy humans  
393 could be induced *in vitro* to exert ROS, CD11b and contact-dependent suppressive activity on  
394 T cells upon activation with specific stimuli[31]. We detected MHC-II<sup>pos</sup> neutrophils in the BM  
395 and, at least in the mouse, they were able to suppress T-cell proliferation, suggesting that they  
396 were already present as regulatory cells in the reservoir. Moreover, the regulatory neutrophils  
397 from the two species did not undergo higher apoptosis or death as compared to their classical  
398 neutrophils counterparts upon stimulation with LPS, indicating they were not “older” or  
399 hyperactivated[32]. In addition, MHC-II expression by MHC-II<sup>neg</sup> neutrophils could not be  
400 induced *in vitro* by incubation with LPS (data not shown). Whether heterogenous neutrophils  
401 are released from the bone-marrow as distinct subsets under steady state conditions or  
402 correspond to activation or polarization states *in situ* remains an open debate[33] but what we  
403 observed here is that MHC-II<sup>pos</sup> neutrophils able to regulate T cells display a specific neutrophil  
404 “phenotype”[34].

405 Suppressive neutrophils that may be included within a broader category of cells termed  
406 “Myeloid-Derived Suppressor Cells (MDSCs)”[35] accumulate mostly under pathological  
407 conditions. Two main branches of MDSCs have been described: the monocytic MDSCs and the  
408 granulocytic MDSCs (G-MDSCs)[35]. In cancer, G-MDSCs are associated with tumor  
409 progression and escape to the immune surveillance[36]. In chronic infections such as  
410 tuberculosis[37; 38] or AIDS[39], or acute inflammatory syndrome such as sepsis[40] MDSCs  
411 are targeted for new host-directed therapies. However, MDSCs, including regulatory  
412 neutrophils, are also beneficial to the host under some circumstances. Because they sustain the  
413 generation of regulatory T-cells[41] they may help avoiding graft rejection[42]. They can  
414 positively regulate autoimmune disorders[43] or protect the lung from destructive inflammation  
415 during *Pseudomonas aeruginosa* or *Klebsiella pneumoniae* infections[44]. They accumulate  
416 during pregnancy where they are important regulators of fetal-maternal tolerance[45] and in  
417 neonates where they could prevent overwhelming inflammation following microbial  
418 colonization[46]. Recently, Aarts and colleagues demonstrated that neutrophils from healthy  
419 humans could become T-cell suppressive under specific stimulation[31]. Along the same line,  
420 Fine *et al* recently described that neutrophils circulate in healthy donors under several states  
421 included as “primed” cells that are first recruited to the injury site to combat infection[30]. In both  
422 these studies, high levels of CD11b signed the phenotype of these neutrophils, alike the MHC-  
423 II<sup>pos</sup> regulatory neutrophil subset that we describe here. In cattle, there is no description to date

424 of suppressive neutrophils or G-MDSCs. In a recent report, Li and colleagues[47] identified a  
425 subset of MHC-II<sup>pos</sup> neutrophils that accumulated in spleen during *Ostertagia ostertagi* parasitic  
426 infection in cattle and produced the suppressive cytokine IL-10. This subset was the master  
427 regulator of immune suppression in parasitized animals. We did not observe *il10* transcription in  
428 any neutrophil subset nor IL-10 production in the supernatant of neutrophil-T-cells cocultures in  
429 our study (date not shown). Whether MHC-II<sup>pos</sup> regulatory neutrophils that we identified are  
430 related to the subset identified by Li et al[47] remains an open question.

431 Regulatory neutrophils, or G-MDSCs, block T-cell proliferation through different  
432 mechanisms[14] including ROS production[48]. We observed in both species that direct contact  
433 between MHC-II<sup>pos</sup> neutrophils and T-cells was necessary to induce suppression, as was also  
434 reported for G-MDSCs. Formation of a synapse is believed to greatly enhance suppression  
435 especially when the delivery of short-lived molecules such as H<sub>2</sub>O<sub>2</sub> is instrumental[35].  
436 Interestingly, we observed here a significantly higher production of total ROS upon chemical  
437 stimulation by MHC-II<sup>pos</sup> neutrophils as compared to their MHC-II<sup>neg</sup> counterparts which did not  
438 translate into higher killing of *E. coli*. Pliyev and colleagues demonstrated that NADPH  
439 dependent ROS were required for the expression of MHC-II in human neutrophils activated by  
440 GM-CSF and IFN $\gamma$ [49]. Whether the higher ROS production recorded in our study is linked to  
441 the suppression mechanism remains to be investigated. In both the mouse and the bovine (data  
442 not shown), MHC-II was also involved in the mechanism, as blocking this molecule partially  
443 relieved the suppression of T-cell proliferation, emphasizing the need for synapse formation  
444 between the T-cell and the regulatory neutrophil. In the mouse, we observed that CD11b was  
445 also involved, as reported for human neutrophils acquiring suppressive activity upon *in vitro*  
446 stimulation[31]. Another feature of mouse regulatory neutrophil was surface expression and up-  
447 regulated gene transcription of *PD-L1*. This molecule is an important immune check-point and  
448 a favorite target for cancer treatment. MDSCs express high levels of PD-L1[50] which is involved  
449 in T-cell suppression. We could not investigate PD-L1 expression by cattle MHC-II<sup>pos</sup> regulatory  
450 neutrophils due to a lack of reagents. Of note, CD14<sup>pos</sup> monocytes expressing PD-L1  
451 accumulate in blood of cattle infected by *Mycoplasma bovis*[51], a strongly immunosuppressive  
452 pathogen causing antibiotic resistant mastitis and other diseases. PD-L1 is now a target for host-  
453 directed therapies of cattle infected by this pathogen[52].

454 To conclude, comparative analysis of mouse and bovine species allowed us to characterize a  
455 new subset of regulatory neutrophils that are able to suppress T cells. In the near future, we  
456 will investigate how these cells behave during clinical conditions in cattle such as mastitis,  
457 which remains one of the most important issue in dairy farming. We believe that such studies  
458 are of utmost importance to better understand the physiopathology of this disease, especially  
459 during chronic infections that remain difficult to treat. Our findings could lead to the discovery  
460 of new biomarkers and development of innovative host-directed therapies[52] targeting

461 regulatory neutrophils for more effective clearance of pathogens and better control of  
462 mammary gland inflammation and damage.



463 **ACKNOWLEDGMENTS**

464 Marion Rambault conducts her doctoral project under a CIFRE agreement (Industrial  
465 agreement of learning/training by research, CIFRE N° 2019/0776) signed with Institut de  
466 l'Elevage IDELE. We are grateful to Théodore Vinais for his early contribution during his  
467 internship to the characterization of the two neutrophils subsets in cattle.

468 Corinne Beauge and her team (PFIE, INRAE, Nouzilly) are gratefully acknowledged for mice  
469 care. We warmly thank Eric Briant and his team (UE-PAO, INRAE, Nouzilly) for bovine blood  
470 sampling and animal care. We thank the staff of the Abattoir du Perche Vendômois for valuable  
471 access to and assistance for bovine post-mortem sampling. Bovine CD11b hybridoma was a  
472 kind gift from Dr. Dirk Werling (Royal Veterinary College of London).

473 This work was supported by a grant from the French Agence Nationale de la Recherche under  
474 the Carnot Program France Future Elevage (BoNeutro), the EGER program of APIS-GENE  
475 (MASTICELLS), and the Région Centre Val de Loire grant N°32000584 “inflammation et  
476 infection”) and the EUROFERI project (FEDER-FSE Centre Val de Loire 2014-2020, N° EX  
477 010233).

478

479 **AUTHOR CONTRIBUTIONS**

480 MR designed and did most of the experiments for cattle neutrophils and EDD for mouse  
481 neutrophils. They analyzed data and prepared all manuscript figures. YLV realized flow  
482 cytometry analysis and sorting of mouse and cattle neutrophils. PC helped with the Mixed  
483 Leukocyte Reaction in cattle. FG helped with bacterial experiments. PG helped with  
484 transcriptomic analysis, critically analyzed the data and revised the manuscript. PR brought  
485 valuable expertise on cattle neutrophils purification methods, critically analyzed the data and  
486 revised the manuscript. NW and AR obtained grants, supervised all aspects of the work,  
487 critically analyzed the data and wrote the manuscript. AR also contributed to important  
488 experiments in cattle. All authors read and approved the manuscript for publication.

489

490 **Competing Interests Statement**

491 The authors declare that the research was conducted in the absence of any commercial or  
492 financial relationships that could be construed as a potential conflict of interest

493

494

495 **REFERENCES**

- 496 [1] E. Kolaczkowska, and P. Kubes, Neutrophil recruitment and function in health and  
497 inflammation. *Nature reviews. Immunology* 13 (2013) 159-75.
- 498 [2] K. Futosi, S. Fodor, and A. Mócsai, Neutrophil cell surface receptors and their intracellular  
499 signal transduction pathways. *Int Immunopharmacol* 17 (2013) 638-650.
- 500 [3] G.T. Nguyen, E.R. Green, and J. Mecsas, Neutrophils to the ROScue: Mechanisms of  
501 NADPH oxidase activation and bacterial resistance. *Front Cell Infect Microbiol* 7 (2017)  
502 373-373.
- 503 [4] W.J. Reagan, A.R.I. Rovira, and D.B. DeNicola, *Veterinary hematology: atlas of common*  
504 *domestic and non-domestic species*, Wiley, 2019.
- 505 [5] L.L. Bassel, and J.L. Caswell, Bovine neutrophils in health and disease. *Cell and Tissue*  
506 *Res* 371 (2018) 617-637.
- 507 [6] J. Mestas, and C.C.W. Hughes, Of mice and not men: differences between mouse and  
508 human immunology. *J Immunol* 172 (2004) 2731-2738.
- 509 [7] P. Rainard, and C. Riollot, Mobilization of neutrophils and defense of the bovine mammary  
510 gland. *Reproduction, nutrition, development* 43 (2003) 439-57.
- 511 [8] J.F. Deniset, B.G. Surewaard, W.-Y. Lee, and P. Kubes, Splenic Ly6G<sup>high</sup> mature and  
512 Ly6G<sup>int</sup> immature neutrophils contribute to eradication of *S. pneumoniae*. *J Exp Med*  
513 214 (2017) 1333-1350.
- 514 [9] I. Puga, M. Cols, C.M. Barra, B. He, L. Cassis, M. Gentile, L. Comerma, A. Chorny, M.  
515 Shan, W. Xu, G. Magri, D.M. Knowles, W. Tam, A. Chiu, J.B. Bussel, S. Serrano, J.A.  
516 Lorente, B. Bellosillo, J. Lloreta, N. Juanpere, F. Alameda, T. Baró, C.D. de Heredia,  
517 N. Torán, A. Català, M. Torreadell, C. Fortuny, V. Cusí, C. Carreras, G.A. Diaz, J.M.  
518 Blander, C.M. Farber, G. Silvestri, C. Cunningham-Rundles, M. Calvillo, C. Dufour, L.D.  
519 Notarangelo, V. Lougaris, A. Plebani, J.L. Casanova, S.C. Ganal, A. Diefenbach, J.I.  
520 Aróstegui, M. Juan, J. Yagüe, N. Mahlaoui, J. Donadieu, K. Chen, and A. Cerutti, B  
521 cell-helper neutrophils stimulate the diversification and production of immunoglobulin  
522 in the marginal zone of the spleen. *Nature immunology* 13 (2011) 170-80.
- 523 [10] H.R. Hampton, and T. Chtanova, The lymph node neutrophil. *Seminars in immunology* 28  
524 (2016) 129-36.
- 525 [11] B.G. Yipp, J.H. Kim, R. Lima, L.D. Zbytnuik, B. Petri, N. Swanlund, M. Ho, V.G. Szeto, T.  
526 Tak, L. Koenderman, P. Pickkers, A.T.J. Tool, T.W. Kuijpers, T.K. van den Berg, M.R.  
527 Looney, M.F. Krummel, and P. Kubes, The lung is a host defense niche for immediate  
528 neutrophil-mediated vascular protection. *Science immunol* 2 (2017) eaam8929.
- 529 [12] A. Mócsai, Diverse novel functions of neutrophils in immunity, inflammation, and beyond.  
530 *J Exp Med* 210 (2013) 1283-99.
- 531 [13] A. Mantovani, M.A. Cassatella, C. Costantini, and S. Jaillon, Neutrophils in the activation  
532 and regulation of innate and adaptive immunity. *Nature reviews. Immunology* 11 (2011)  
533 519-531.
- 534 [14] J. Pillay, T. Tak, V.M. Kamp, and L. Koenderman, Immune suppression by neutrophils  
535 and granulocytic myeloid-derived suppressor cells: similarities and differences. *Cellular*  
536 *and molecular life sciences : CMLS* 70 (2013) 3813-27.
- 537 [15] L.G. Ng, R. Ostuni, and A. Hidalgo, Heterogeneity of neutrophils. *Nature reviews.*  
538 *Immunology* 19 (2019) 255-265.
- 539 [16] M.J. Barnden, J. Allison, W.R. Heath, and F.R. Carbone, Defective TCR expression in  
540 transgenic mice constructed using cDNA-based alpha- and beta-chain genes under the  
541 control of heterologous regulatory elements. *Immunology and cell biology* 76 (1998)  
542 34-40.
- 543 [17] V. Abadie, E. Badell, P. Douillard, D. Ensergueix, P.J. Leenen, M. Tanguy, L. Fiette, S.  
544 Saeland, B. Gicquel, and N. Winter, Neutrophils rapidly migrate via lymphatics after  
545 *Mycobacterium bovis* BCG intradermal vaccination and shuttle live bacilli to the  
546 draining lymph nodes. *Blood* 106 (2005) 1843-1850.
- 547 [18] M. Rambault, R. Borkute, E. Doz-Deblauwe, Y. Le Vern, N. Winter, A. Dorhoi, and A.  
548 Remot, Isolation of bovine neutrophils by fluorescence- and magnetic-activated cell

- 549 sorting. in: S. Brandau, and A. Dorhoi, (Eds.), Myeloid-Derived Suppressor Cells, 2020,  
550 pp. In press.
- 551 [19] P. Roussel, A. Porcherie, M. Répérant-Ferter, P. Cunha, C. Gitton, P. Rainard, and P.  
552 Germon, Escherichia coli mastitis strains: In vitro phenotypes and severity of infection  
553 in vivo. *PloS one* 12 (2017) e0178285.
- 554 [20] G.P. Carlson, and J.J. Kaneko, Isolation of leukocytes from bovine peripheral blood.  
555 *Proceedings of the Society for Experimental Biology and Medicine*. Society for  
556 Experimental Biology and Medicine (New York, N.Y.) 142 (1973) 853-6.
- 557 [21] P. Rainard, C. Riollot, B. Poutrel, and M.J. Paape, Phagocytosis and killing of  
558 Staphylococcus aureus by bovine neutrophils after priming by tumor necrosis factor-  
559 alpha and the des-arginine derivative of C5a. *American journal of veterinary research*  
560 61 (2000) 951-9.
- 561 [22] J.M. Daley, A.A. Thomay, M.D. Connolly, J.S. Reichner, and J.E. Albina, Use of Ly6G-  
562 specific monoclonal antibody to deplete neutrophils in mice. *J Leukoc Biol* 83 (2008)  
563 64-70.
- 564 [23] W.C. Davis, S. Marusic, H.A. Lewin, G.A. Splitter, L.E. Perryman, T.C. McGuire, and J.R.  
565 Gorham, The development and analysis of species specific and cross reactive  
566 monoclonal antibodies to leukocyte differentiation antigens and antigens of the major  
567 histocompatibility complex for use in the study of the immune system in cattle and other  
568 species. *Vet Immunol Immunopathol* 15 (1987) 337-76.
- 569 [24] F. Grandoni, M.M. Elnaggar, G.S. Abdellrazeq, F. Signorelli, L.M. Fry, C. Marchitelli, V.  
570 Hulubei, S.A. Khaliel, H.A. Torkey, and W.C. Davis, Characterization of leukocyte  
571 subsets in buffalo (*Bubalus bubalis*) with cross-reactive monoclonal antibodies specific  
572 for bovine MHC class I and class II molecules and leukocyte differentiation molecules.  
573 *Developmental and comparative immunology* 74 (2017) 101-109.
- 574 [25] R. Lombard, E. Doz, F. Carreras, M. Epardaud, Y. Le Vern, D. Buzoni-Gatel, and N.  
575 Winter, IL-17RA in non-hematopoietic cells controls CXCL-1 and 5 critical to recruit  
576 neutrophils to the lung of mycobacteria-infected mice during the adaptive immune  
577 response. *PloS one* 11 (2016) e0149455.
- 578 [26] K.E. Pauken, and E.J. Wherry, Overcoming T cell exhaustion in infection and cancer.  
579 *Trends in immunology* 36 (2015) 265-76.
- 580 [27] A. Hidalgo, E.R. Chilvers, C. Summers, and L. Koenderman, The neutrophil life cycle.  
581 *Trends in immunology* 40 (2019) 584-597.
- 582 [28] A.W. Segal, How neutrophils kill microbes. *Annual review of immunology* 23 (2005) 197-  
583 223.
- 584 [29] I. Miralda, S.M. Uriarte, and K.R. McLeish, Multiple phenotypic changes define neutrophil  
585 priming. *Front Cell Infect Microbiol* 7 (2017) 217-217.
- 586 [30] N. Fine, O. Barzilay, C. Sun, N. Wellappuli, F. Tanwir, J.W. Chadwick, M. Oveisi, N.  
587 Tasevski, D. Prescott, M. Gargan, D.J. Philpott, Y. Dror, and M. Glogauer, Primed  
588 PMNs in healthy mouse and human circulation are first responders during acute  
589 inflammation. *Blood Adv* 3 (2019) 1622-1637.
- 590 [31] C.E.M. Aarts, I.H. Hiemstra, E.P. Béguin, A.J. Hoogendijk, S. Bouchmal, M. van Houdt,  
591 A.T.J. Tool, E. Mul, M.H. Jansen, H. Janssen, F.P.J. van Alphen, J.-P. de Boer, C.L.  
592 Zuur, A.B. Meijer, T.K. van den Berg, and T.W. Kuijpers, Activated neutrophils exert  
593 myeloid-derived suppressor cell activity damaging T cells beyond repair. *Blood Adv* 3  
594 (2019) 3562-3574.
- 595 [32] S.M. Lawrence, R. Corriden, and V. Nizet, How neutrophils meet their end. *Trends in*  
596 *immunology* 41 (2020) 531-544.
- 597 [33] J.F. Deniset, and P. Kubes, Neutrophil heterogeneity: Bona fide subsets or polarization  
598 states? *J Leukoc Biol* 103 (2018) 829-838.
- 599 [34] P. Hellebrekers, N. Vrisekoop, and L. Koenderman, Neutrophil phenotypes in health and  
600 disease. *Eur J Clin Invest* 48 (2018) e12943.
- 601 [35] D.I. Gabrilovich, and S. Nagaraj, Myeloid-derived suppressor cells as regulators of the  
602 immune system. *Nature reviews. Immunology* 9 (2009) 162-74.

- 603 [36] P. Lecot, M. Sarabi, M. Pereira Abrantes, J. Mussard, L. Koenderman, C. Caux, N.  
604 Bendriss-Vermare, and M.-C. Michallet, Neutrophil heterogeneity in cancer: from  
605 biology to therapies. *Front Immunol* 10 (2019).
- 606 [37] N. du Plessis, L. Loebenberg, M. Kriel, F. von Groote-Bidlingmaier, E. Ribechini, A.G.  
607 Loxton, P.D. van Helden, M.B. Lutz, and G. Walzl, Increased frequency of myeloid-  
608 derived suppressor cells during active tuberculosis and after recent mycobacterium  
609 tuberculosis infection suppresses T-cell function. *American journal of respiratory and  
610 critical care medicine* 188 (2013) 724-32.
- 611 [38] J.K. Knaul, S. Jörg, D. Oberbeck-Mueller, E. Heinemann, L. Scheuermann, V. Brinkmann,  
612 H.J. Mollenkopf, V. Yeremeev, S.H. Kaufmann, and A. Dorhoi, Lung-residing myeloid-  
613 derived suppressors display dual functionality in murine pulmonary tuberculosis.  
614 *American journal of respiratory and critical care medicine* 190 (2014) 1053-66.
- 615 [39] A. Dorhoi, L.A. Kotzé, J.A. Berzofsky, Y. Sui, D.I. Gabilovich, A. Garg, R. Hafner, S.A.  
616 Khader, U.E. Schaible, S.H. Kaufmann, G. Walzl, M.B. Lutz, R.N. Mahon, S. Ostrand-  
617 Rosenberg, W. Bishai, and N. du Plessis, Therapies for tuberculosis and AIDS:  
618 myeloid-derived suppressor cells in focus. *The Journal of clinical investigation* 130  
619 (2020) 2789-2799.
- 620 [40] I.T. Schrijver, C. Théroude, and T. Roger, Myeloid-Derived Suppressor Cells in sepsis.  
621 *Front Immunol* 10 (2019) 327.
- 622 [41] G. Amodio, J. Cichy, P. Conde, G. Matteoli, A. Moreau, J. Ochando, B.H. Oral, M.  
623 Pekarova, E.J. Ryan, J. Roth, Y. Sohrabi, M.-C. Cuturi, and S. Gregori, Role of myeloid  
624 regulatory cells (MRCs) in maintaining tissue homeostasis and promoting tolerance in  
625 autoimmunity, inflammatory disease and transplantation. *Cancer Immunol Immunother*  
626 68 (2019) 661-672.
- 627 [42] T. Wu, Y. Zhao, and Y. Zhao, The roles of myeloid-derived suppressor cells in  
628 transplantation. *Expert Rev Clin Immunol* 10 (2014) 1385-1394.
- 629 [43] P. Boros, J. Ochando, and M. Zeher, Myeloid derived suppressor cells and autoimmunity.  
630 *Human Immunol* 77 (2016) 631-636.
- 631 [44] S.L. Poe, M. Arora, T.B. Oriss, M. Yarlagadda, K. Isse, A. Khare, D.E. Levy, J.S. Lee, R.K.  
632 Mallampalli, Y.R. Chan, A. Ray, and P. Ray, STAT1-regulated lung MDSC-like cells  
633 produce IL-10 and efferocytose apoptotic neutrophils with relevance in resolution of  
634 bacterial pneumonia. *Mucosal Immunol* 6 (2013) 189-99.
- 635 [45] M. Ahmadi, M. Mohammadi, M. Ali-Hassanzadeh, M. Zare, and B. Gharesi-Fard, MDSCs  
636 in pregnancy: Critical players for a balanced immune system at the feto-maternal  
637 interface. *Cell Immunol* 346 (2019) 103990.
- 638 [46] Y.M. He, X. Li, M. Perego, Y. Nefedova, A.V. Kossenkov, E.A. Jensen, V. Kagan, Y.F. Liu,  
639 S.Y. Fu, Q.J. Ye, Y.H. Zhou, L. Wei, D.I. Gabilovich, and J. Zhou, Transitory presence  
640 of myeloid-derived suppressor cells in neonates is critical for control of inflammation.  
641 *Nature medicine* 24 (2018) 224-231.
- 642 [47] L. Li, H. Si, S.W. Wu, J.O. Mendez, D. Zarlenga, W. Tuo, and Z. Xiao, Characterization of  
643 IL-10-producing neutrophils in cattle infected with *Ostertagia ostertagi*. *Scientific  
644 reports* 9 (2019) 20292.
- 645 [48] K. Ohl, and K. Tenbrock, Reactive Oxygen Species as regulators of MDSC-mediated  
646 immune suppression. *Front Immunol* 9 (2018).
- 647 [49] B.K. Pliyev, T.V. Dimitrieva, and V.G. Savchenko, Cytokine-mediated induction of MHC  
648 class II in human neutrophils is dependent on NADPH oxidase activity. *European  
649 journal of cell biology* 94 (2015) 67-70.
- 650 [50] R. Weber, V. Fleming, X. Hu, V. Nagibin, C. Groth, P. Altevogt, J. Utikal, and V. Umansky,  
651 Myeloid-Derived Suppressor Cells hinder the anti-cancer activity of immune checkpoint  
652 inhibitors. *Front Immunol* 9 (2018).
- 653 [51] S. Goto, S. Konnai, T. Okagawa, A. Nishimori, N. Maekawa, S. Gondaira, H. Higuchi, M.  
654 Koiwa, M. Tajima, J. Kohara, S. Ogasawara, Y. Kato, Y. Suzuki, S. Murata, and K.  
655 Ohashi, Increase of cells expressing PD-1 and PD-L1 and enhancement of IFN- $\gamma$   
656 production via PD-1/PD-L1 blockade in bovine mycoplasmosis. *Immun Inflammation  
657 Dis* 5 (2017) 355-363.

658 [52] S. Goto, S. Konnai, Y. Hirano, J. Kohara, T. Okagawa, N. Maekawa, Y. Sajiki, K. Watari,  
659 E. Minato, A. Kobayashi, S. Gondaira, H. Higuchi, M. Koiwa, M. Tajima, E. Taguchi, R.  
660 Uemura, S. Yamada, M.K. Kaneko, Y. Kato, K. Yamamoto, M. Toda, Y. Suzuki, S.  
661 Murata, and K. Ohashi, Upregulation of PD-L1 expression by prostaglandin E2 and the  
662 enhancement of IFN- $\gamma$  by anti-PD-L1 antibody combined with a COX-2 inhibitor in  
663 *Mycoplasma bovis* infection. Front Vet Sci 7 (2020).  
664

665



666 **Figure legends**

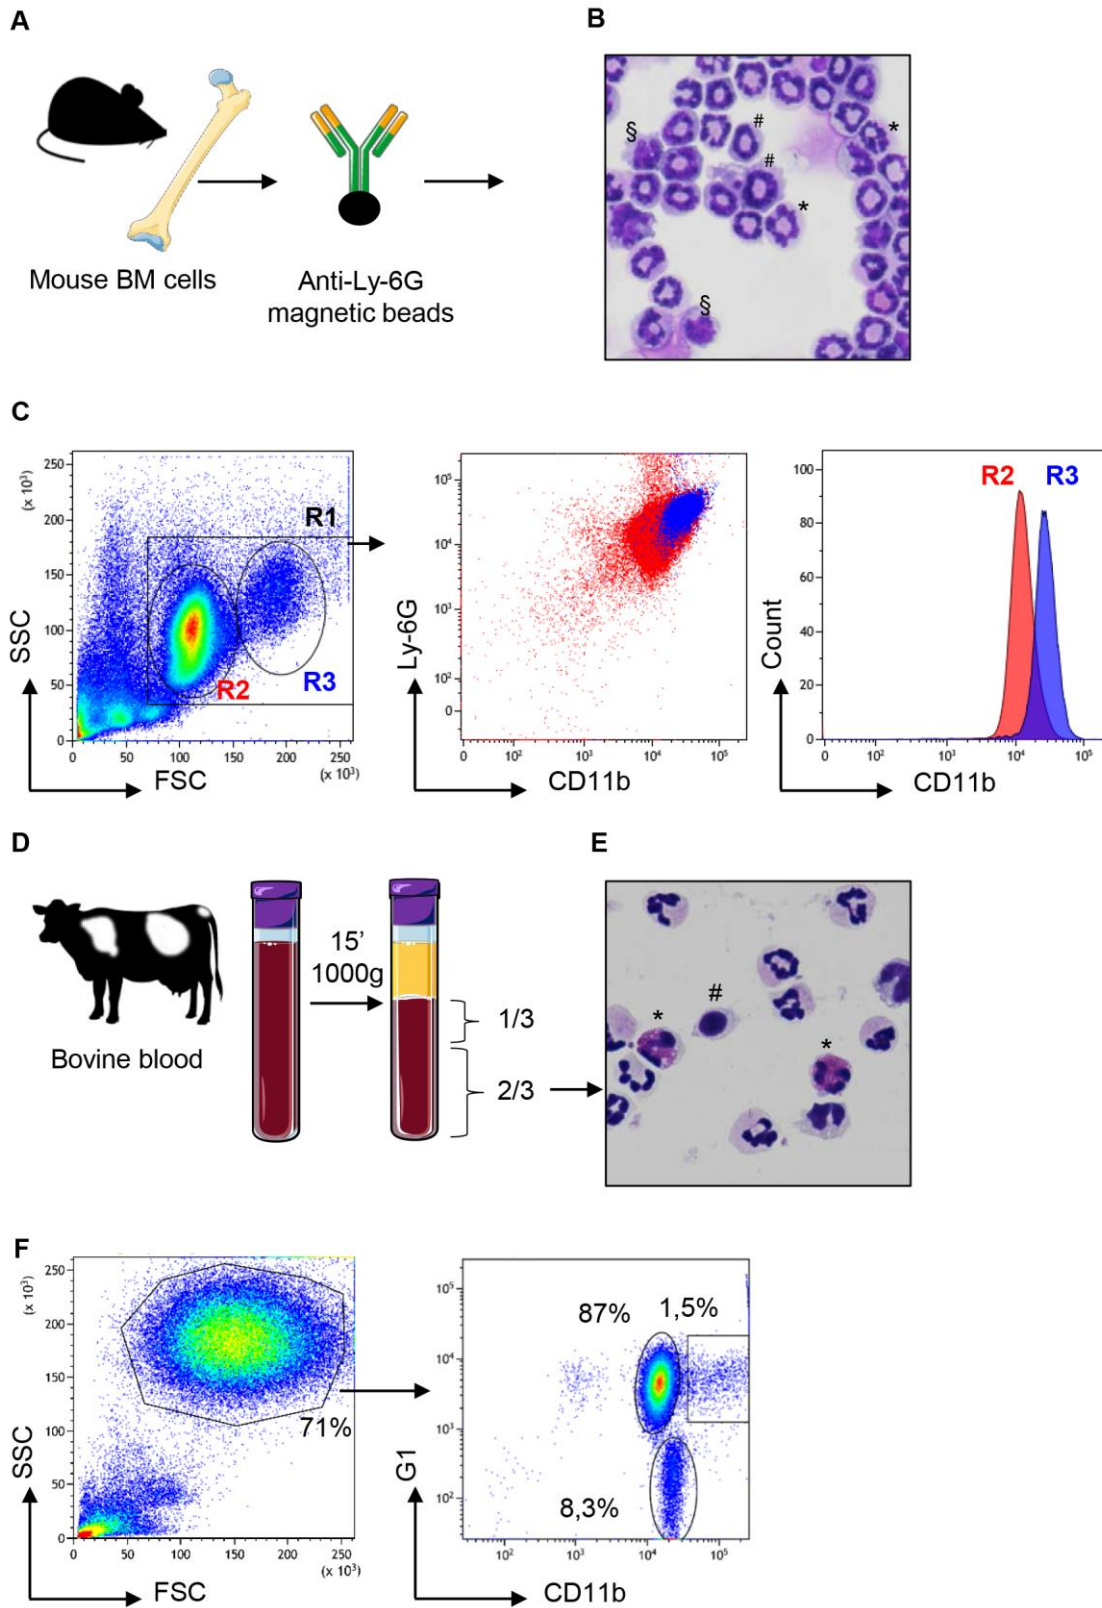

667

668

669

670

**Figure 1. Neutrophils from mouse bone marrow or cattle blood display heterogeneous profiles (A) BM cells from C57BL/6 adult mice were magnetically purified with anti-Ly6G beads (B) These cells stained with May Grünwald Giemsa after cytocentrifugation on glass**



671 slides displayed heterogenous profiles with segmented nuclei (\*), banded nuclei (#) as well as  
672 some nuclei with a mononuclear kidney shape (§). **(C)** After anti-Ly-6G magnetic purification,  
673 mouse cells were analyzed by flow cytometry using the LSR Fortessa™ X-20 apparatus and  
674 in the “granulocytes” R1 gate, a bimodal distribution of FSC<sup>med</sup> (R2) and FSC<sup>high</sup> (R3) cells was  
675 observed on a linear scale (first panel). Labelling with anti-Ly6-G and anti-CD11b confirmed  
676 this heterogeneity after dot plot analysis (middle panel) with bimodal distribution of CD11b<sup>med</sup>  
677 (R2) and CD11b<sup>hi</sup> (R3) cells as displayed on the histogram analysis (right panel). **(D)** Blood  
678 from Hostein Friesian cows was centrifuged and the lower 2/3 of the tube enriched in  
679 neutrophils were collected. **(E)** These cells, as observed after cytocentrifugation and staining  
680 by May Grünwald Giemsa, were mainly neutrophils, characterized by their polylobed nucleus  
681 but monocytes (#) and eosinophils (\*) were also observed in various proportions depending  
682 on the animal. **(F)** These cells were analyzed by flow cytometry and FSC x SSC dot plot  
683 showed granulocytes in a gate that represented 71% of analyzed cells (left panel). After  
684 labeling with anti-G1 and anti CD11b, dot-plot analysis of the “granulocytes” gate (right panel)  
685 revealed three subsets: eosinophils that were negative for the G1 marker (around 8% of  
686 granulocytes) and two subsets of G1<sup>pos</sup> neutrophils that were CD11b<sup>med</sup> (87%) or CD11b<sup>hi</sup>  
687 (1.5%). The most representative animal is shown (n=4 for mouse, n=6 for bovine), although in  
688 cattle the proportion of eosinophils and CD11b<sup>hi</sup> neutrophils circulating in blood varied between  
689 animals.

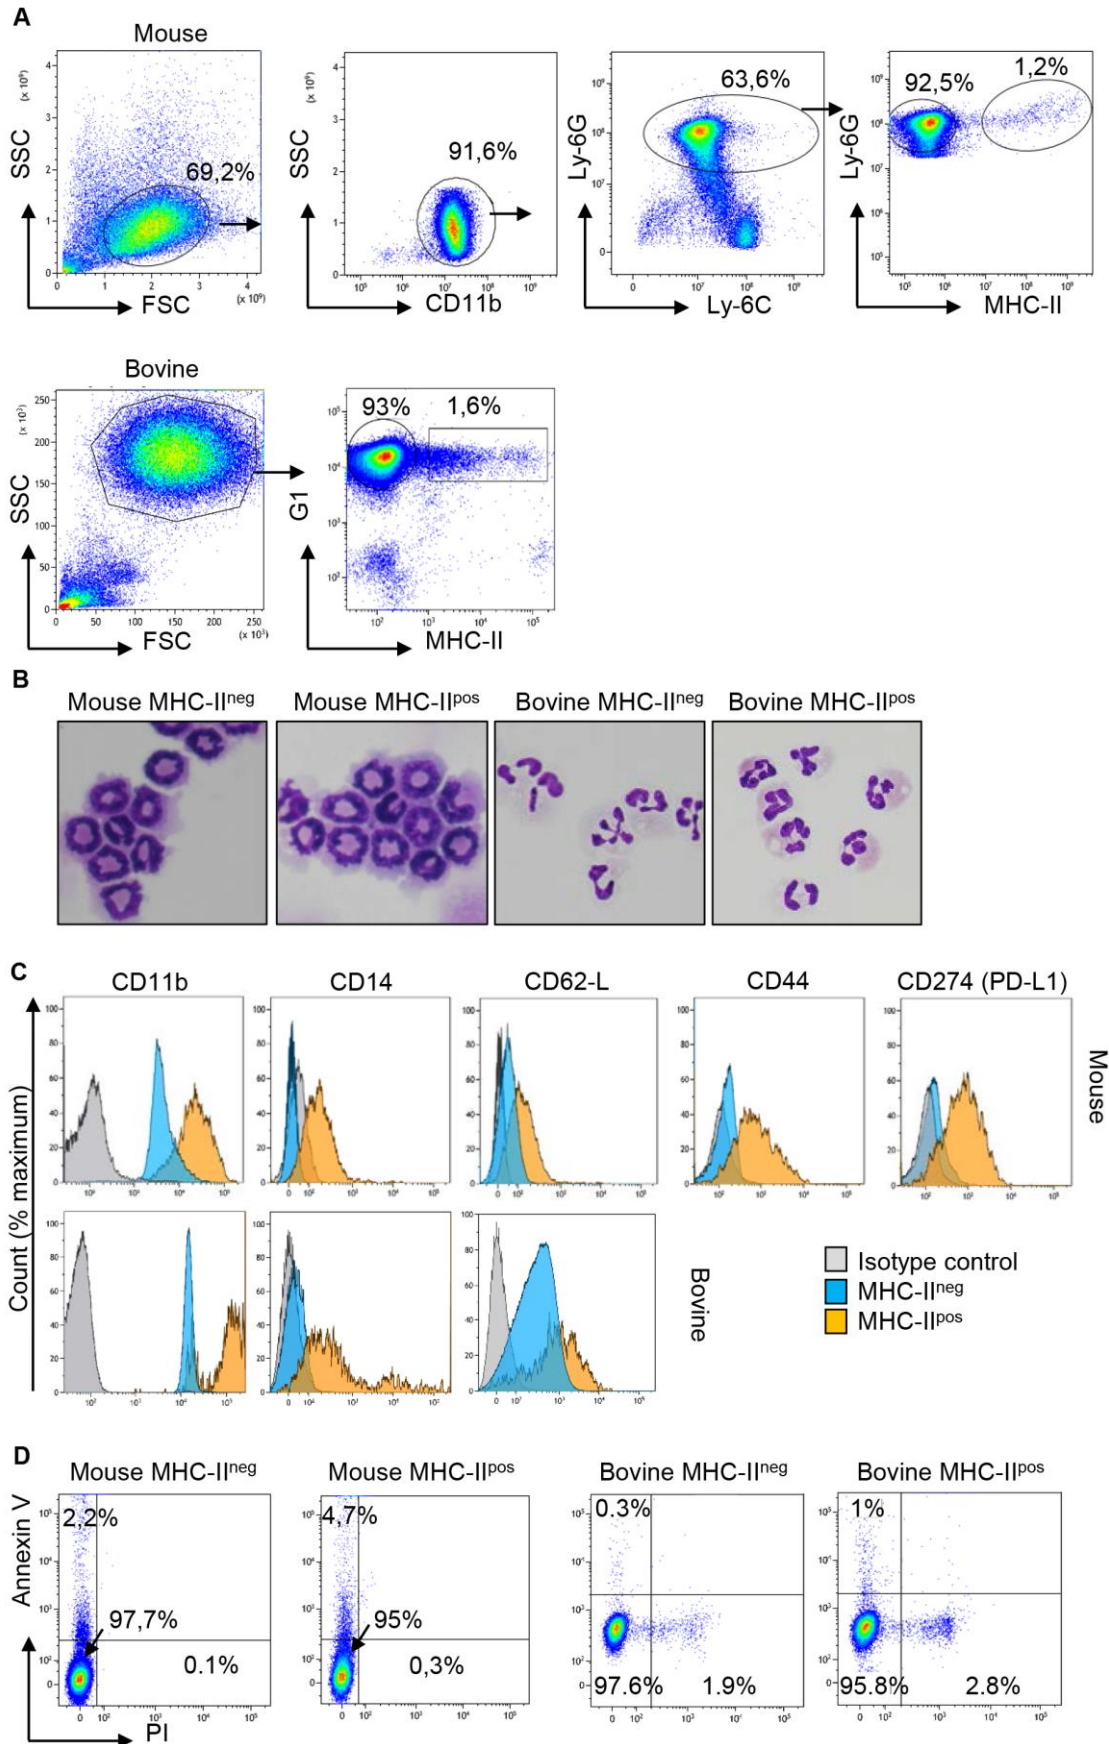

**Figure 2. Two populations of neutrophils can be distinguished on the basis of specific surface makers, including MHC-II, in the mouse and the bovine. (A) Cells were prepared**

693 from mouse BM or cattle blood as described in Fig 1 and neutrophils were sorted with a MoFlo  
694 Astrios<sup>EQ</sup> apparatus after labelling with eFluor viability dye 780, anti-CD11b, anti-Ly-6C, anti-  
695 Ly-6G and anti MHC-II in the mouse or eFluor viability dye 780, anti-G1 and anti-MHC-II in the  
696 bovine. Representative plots that show the major proportion of MHC-II<sup>neg</sup> and the minor  
697 proportion of MHC-II<sup>pos</sup> neutrophils in both species are depicted. **(B)** The two MHC-II<sup>neg</sup> and  
698 MHC-II<sup>pos</sup> neutrophil populations among total CD11b<sup>pos</sup> Ly6-G<sup>pos</sup> Ly6-C<sup>pos</sup> mouse neutrophils,  
699 or G1<sup>pos</sup> bovine neutrophils, were sorted by flow cytometry (purity >99%), cytocentrifuged and  
700 were indistinguishable after May Grünwald Giemsa staining. **(C)** Histograms represent  
701 expression of CD11b, CD14, CD62-L for both species and CD44 and CD274 /PD-L1 for the  
702 mouse samples on the surface of sorted MHC-II<sup>neg</sup> and MHC-II<sup>pos</sup> neutrophils in comparison to  
703 isotype controls. **(A-C)** Results from one representative animal are depicted (n=6 for mouse,  
704 n=6 for bovine). **(D)** After purification by flow cytometry, MHC-II<sup>neg</sup> and MHC-II<sup>pos</sup> neutrophils  
705 from the two species were incubated with LPS for 1 h and labelled with annexin-V and  
706 propidium iodide (PI) to analyze apoptotic (annexin V+ ; PI-) and dead cells (annexin V+ ; PI+).  
707 Dot plots from one representative animal are depicted (n=4 for mouse, n=3 for bovine).  
708

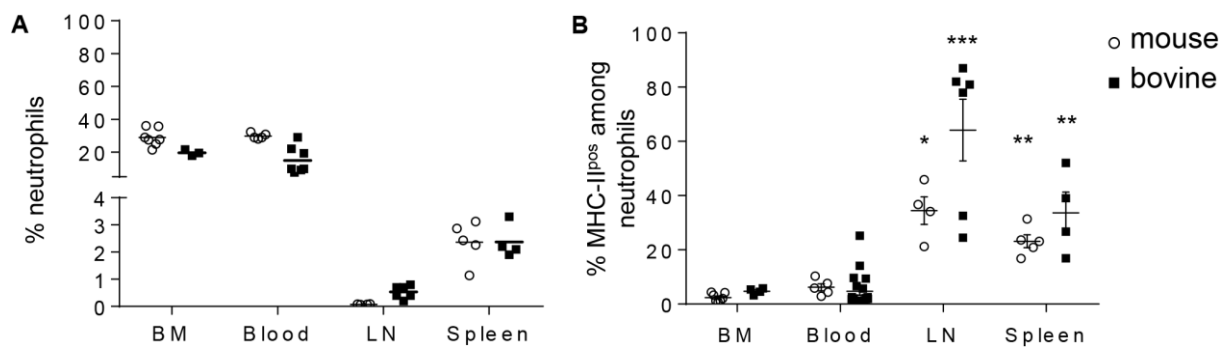

709 **Figure 3. MHC-II<sup>pos</sup> neutrophils are enriched in lymphoid organs in both species. (A-B)**  
710 Cells were prepared from BM or blood from the two species and neutrophils analyzed by flow  
711 cytometry as in Fig 2. Neutrophils present in the lymphoid organs were also analyzed after  
712 collecting post mortem the inguinal (mouse) or tracheobronchial (cattle) lymph nodes (LN) and  
713 spleen. **(A)** The percentage of Ly6-G<sup>pos</sup>, Ly6-C<sup>pos</sup> mouse neutrophils or G1<sup>pos</sup> cattle neutrophils  
714 among total leukocytes and **(B)** The percentage of the MHC-II<sup>pos</sup> subset among total  
715 neutrophils, was analyzed in each compartment. Individual data and the median in each group  
716 are presented. This percentage was significantly higher in lymphoid organs than in mouse BM  
717 or cattle blood. \*  $P<0.05$ ; \*\*  $P<0.01$ ; \*\*\*  $P<0.001$  (Mann Whitney non-parametric test).  
718  
719

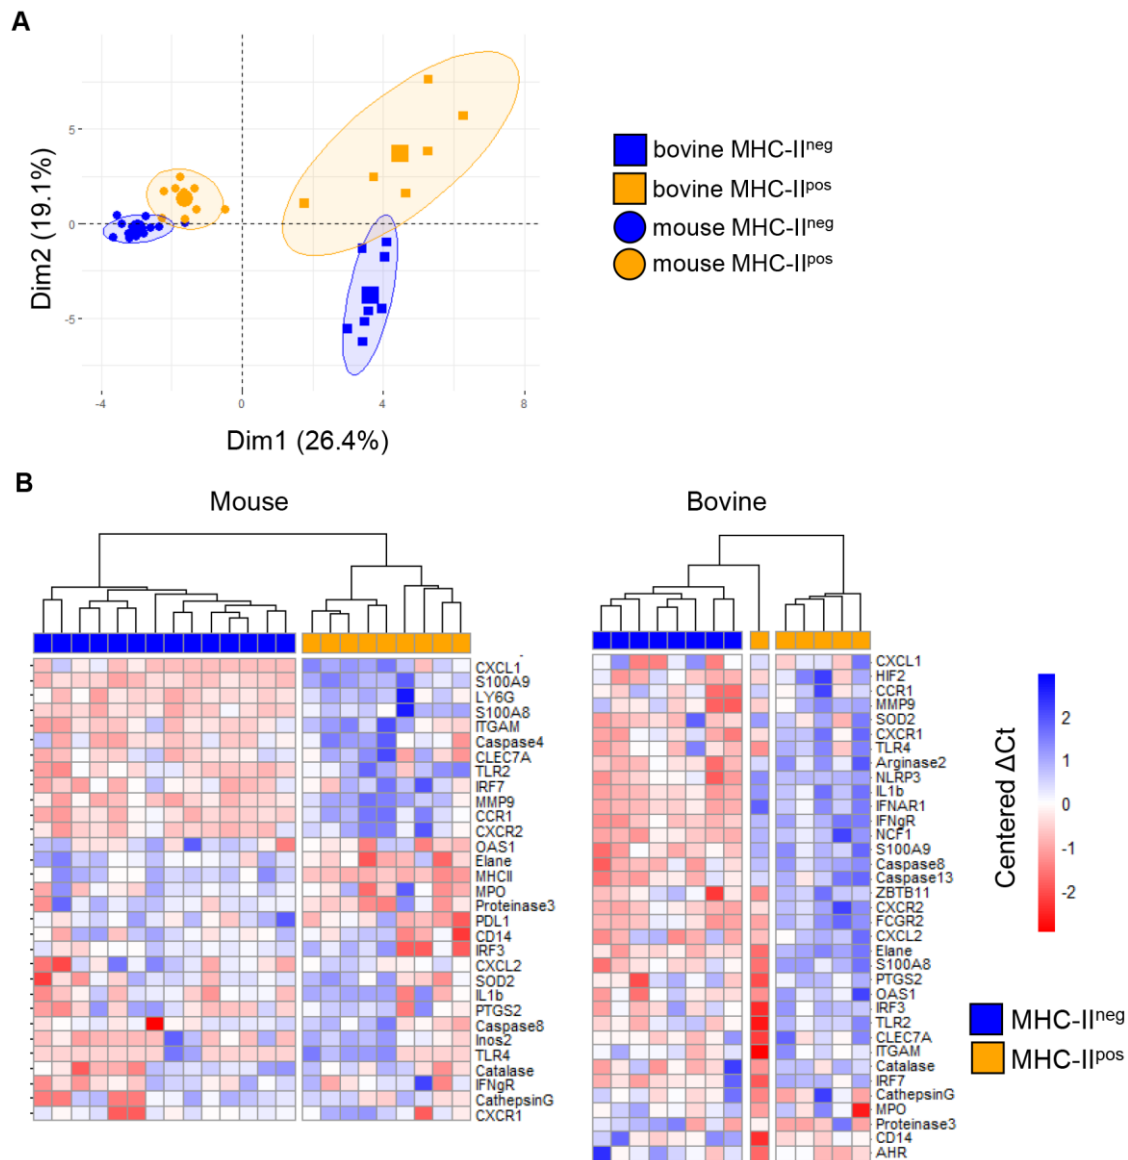

720

721 **Figure 4. MHC-II<sup>pos</sup> and MHC-II<sup>neg</sup> neutrophils display distinct transcriptomic signatures.**

722 Gene expression of the two purified neutrophil subsets (more than 99% purity) from the two

723 species was assessed by quantitative Real Time PCR using sets of primer pairs designed to

724 cover a large range of neutrophils functions. mRNA expression was normalized to the

725 expression of three housekeeping genes for both species to calculate the  $\Delta C_t$  values (A).

726 Principal Component Analysis (PCA) was performed on  $\Delta C_t$  values and the two first

727 dimensions of the PCA plot are depicted. Inclusion in groups of sets of samples are delineated

728 in the colored areas on the graph with a confidence level of 90% (B) Hierarchical clustering of

729 gene expression was performed on median centered  $\Delta C_t$  values for mouse and bovine data

730 sets, using the ward.D2 method. For each gene,  $\Delta C_t$  values were centered to the median  $\Delta C_t$

731 value. Higher or lower  $\Delta C_t$  expression compared to the median value were represented

732 respectively in deep to light red or blue. Expression of a selected set of genes indicated on the

733 figure was clearly distinct in MHC-II<sup>pos</sup> neutrophils or MHC-II<sup>neg</sup> neutrophils. Data represent

734 individual samples (Mouse: n= 14 for MHC-II<sup>neg</sup>, n=9 for MHC-II<sup>pos</sup> Bovine: n=8 for MHC-II<sup>neg</sup>  
 735 n=6 for bovine MHC-II<sup>pos</sup>).  
 736

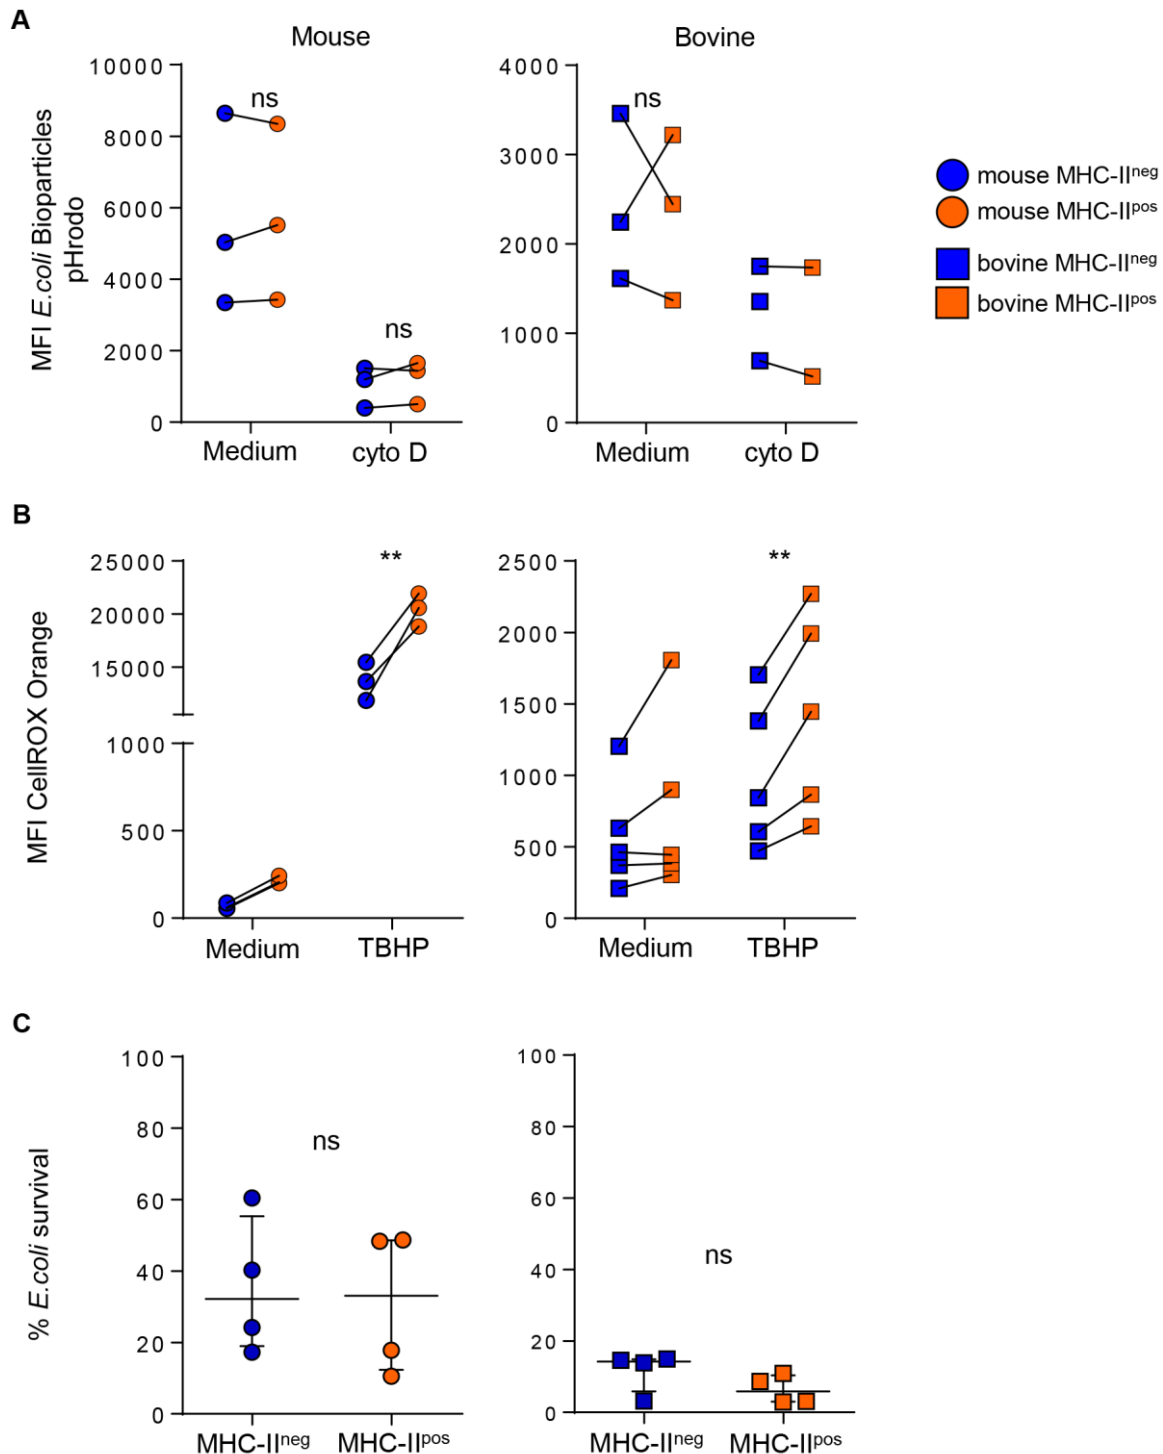

737  
 738 **Figure 5. MHC-II<sup>pos</sup> phagocytose bioparticles and kill *E. coli* similarly to MHC-II<sup>neg</sup>**  
 739 **neutrophils but produce higher levels of ROS. (A).** After purification by cell sorting from the  
 740 BM (mouse) or blood (bovine), phagocytosis by MHC-II<sup>pos</sup> or MHC-II<sup>neg</sup> neutrophils was  
 741 assessed using pHrodo *E. coli* bioparticles. Mean fluorescence intensity was directly correlated  
 742 to ingested particles. Cells were treated with cytochalasin D as indicated. (B). Oxidative stress

743 was measured in MHC-II<sup>pos</sup> and MHC-II<sup>neg</sup> neutrophils using the CellROX Orange probe that  
744 reacts with all ROS species. Cells were activated with TBHP or incubated with medium alone  
745 and levels of ROS were measured by flow cytometry. **(A-B)** Mean fluorescence intensity in  
746 each sample is depicted and paired MHC-II<sup>pos</sup> and MHC-II<sup>neg</sup> samples were analyzed for each  
747 animal. **(C)**. Purified MHC-II<sup>pos</sup> and MHC-II<sup>neg</sup> neutrophils were infected with the *E. coli* P4 strain  
748 and bacterial survival was calculated by determining the ratio of bacteria incubated alone or in  
749 presence of neutrophils. Data represent n=4 independent experiments with neutrophils pooled  
750 from independent lots of 10 mice, or prepared from blood of n=4 independent cows.

751 **(A-C)** \*,  $P < 0.05$ ; \*\*,  $P < 0.01$ ; \*\*\*,  $P < 0.001$  (2way ANOVA).

752



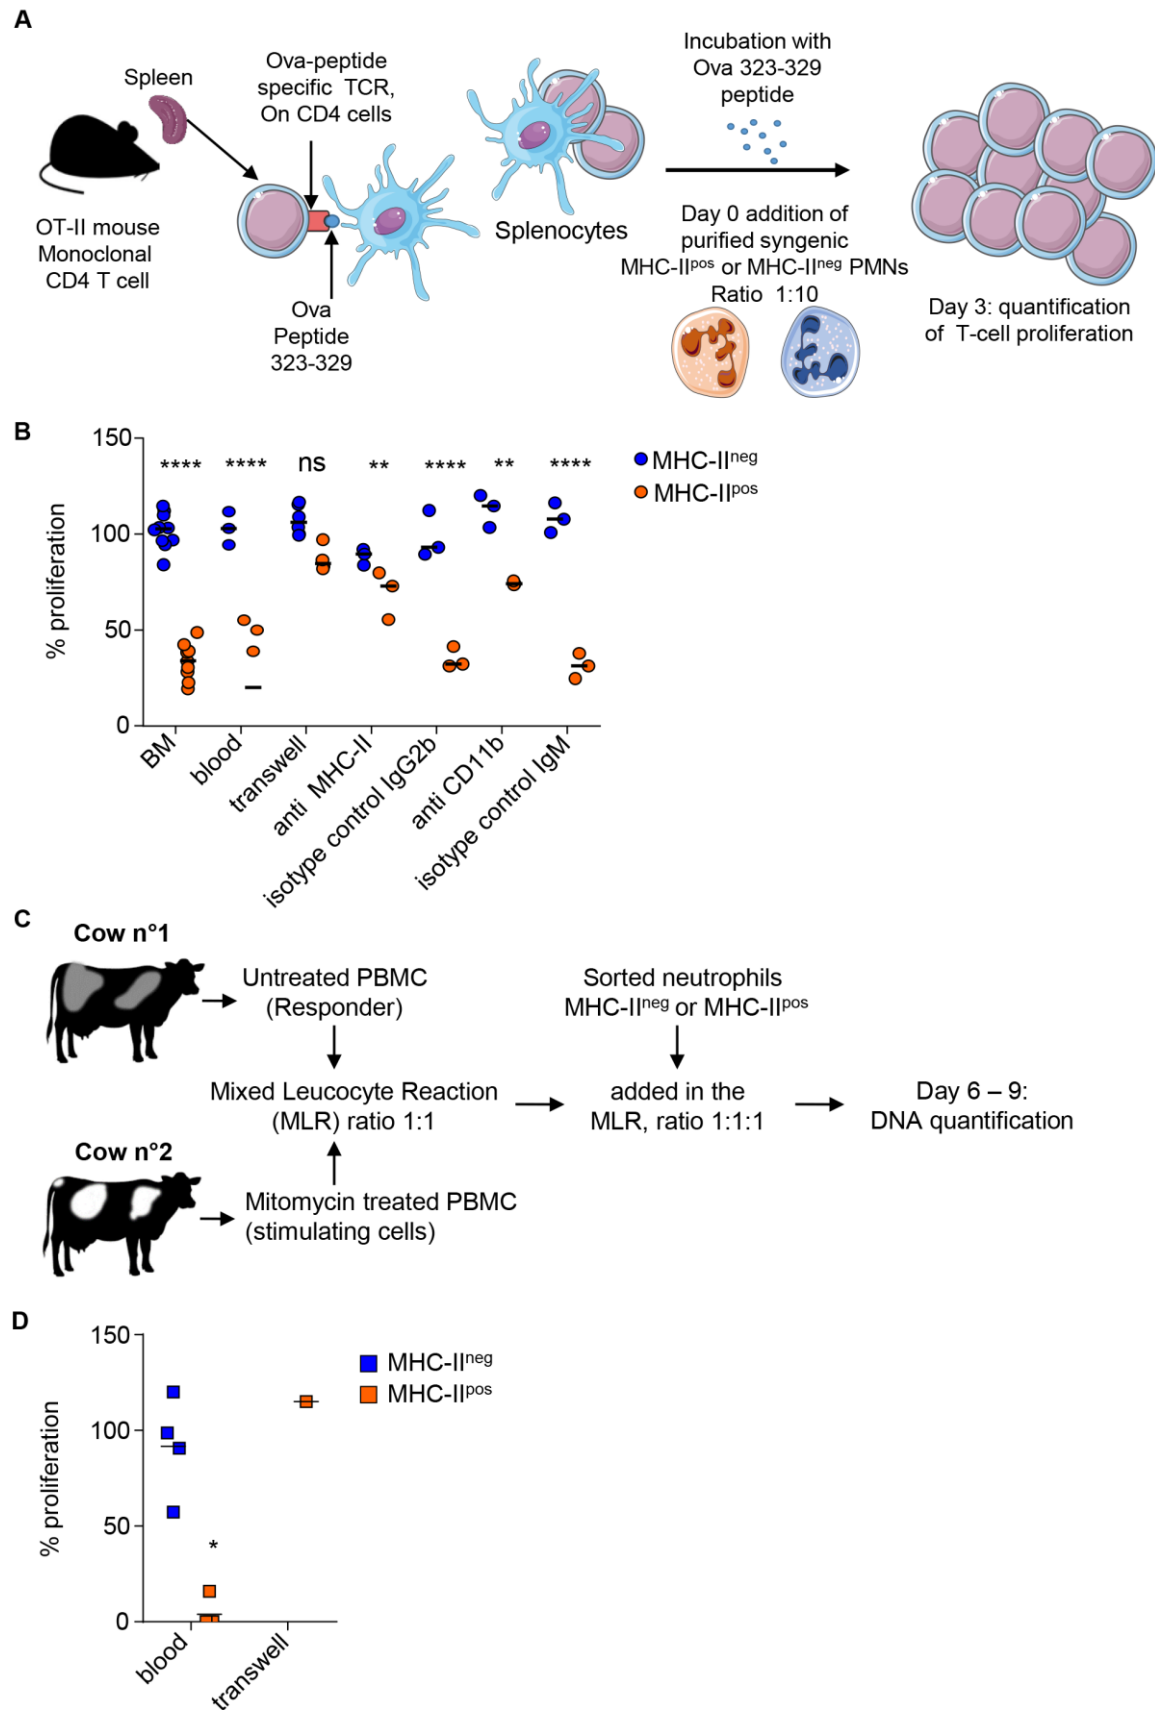

753

754 **Figure 6. MHC-II<sup>pos</sup> but not MHC-II<sup>neg</sup> neutrophils exert suppression of T cells at steady**

755 **state. (A)** In the mouse an antigen -specific proliferation assay was set up with OT-II transgenic

756 mice that carry the monoclonal population of T-cells specific for the Ova 323-329 peptide.

757 Proliferation of splenocytes from OT-II mice activated with the Ova 323-329 peptide was set  
758 up as the maximum and compared to conditions where MHC-II<sup>pos</sup> or MHC-II<sup>neg</sup> neutrophils  
759 purified from syngenic C57BL/6 mice after cell sorting (99% purity) were added with a ratio of  
760 1:10. **(B)** The percentage of T cell proliferation after addition of MHC-II<sup>pos</sup> or MHC-II<sup>neg</sup>  
761 neutrophils was calculated based on OT-II splenocytes proliferation with Ova peptide only.  
762 Neutrophils were prepared from the BM of syngenic mice except for the “blood” sample as  
763 indicated on the graph. Different conditions for the assay are also indicated, with cells  
764 separated by a transwell device, or neutrophils incubated with anti-MHC-II, anti-CD11b or  
765 isotype controls before addition to the proliferating splenocytes. **(C)**. For the bovine, a Mixed  
766 Leucocyte Reaction (MLR) was set up to assess polyclonal T cell proliferation. PBMCs from  
767 the responder animal were isolated and left untreated, while PBMCs from the stimulating  
768 animal were incubated with mitomycin C. PBMCs from the two cows were incubated at ratio  
769 of 1:1. To assess the impact of neutrophils on cattle T cell proliferation, 10<sup>5</sup> of sorted MHC-II<sup>pos</sup>  
770 or MHC-II<sup>neg</sup> neutrophils from the responder animal were added to the reaction at day 4. DNA  
771 was quantified at day 6 and 9. **(D)** The proliferation was calculated by subtracting DNA values  
772 at day 9 from day 6 values. Proliferation measured in the MLR without neutrophils was defined  
773 as the reference 100% proliferation. The proliferation observed in the presence of sorted MHC-  
774 II<sup>pos</sup> or MHC-II<sup>neg</sup> neutrophils was calculated according to the DNA content (Day 9 – Day 6) and  
775 expressed as percentage of the reference value. In one experiment, MHC-II<sup>pos</sup> neutrophils  
776 were separated from proliferating cells by a Transwell device. **(B and D)** Individual data and  
777 the median in each group are represented (3 independent experiments, n≥3 pool of 10 mice,  
778 n=4 cows, n=1 cow for transwell experiment; each represented value is the mean of technical  
779 triplicates). \*, *P*<0.05; \*\*, *P*<0.01; \*\*\*, *P*<0.001 Mann Whitney non parametric test).

780

781

782

783 **Supplementary table and figures legends**

784

|               |                     | <b>Target</b>     | <b>Reactivity</b> | <b>Clone</b>   | <b>Supplier</b>    | <b>Isotype</b>            | <b>Dye</b>         |
|---------------|---------------------|-------------------|-------------------|----------------|--------------------|---------------------------|--------------------|
| <b>Mouse</b>  |                     | CD11b             | mouse             | M1/70          | BD biosciences     | Rat IgG <sub>2b</sub> , κ | V450               |
|               |                     | Ly6G              | mouse             | 1A8            | BD biosciences     | Rat IgG <sub>2a</sub> , κ | PE                 |
|               |                     | Ly6C              | mouse             | AL-21          | BD biosciences     | Rat IgM, κ                | APC                |
|               |                     | MHC-II            | mouse             | 2G9            | BD biosciences     | Rat IgG <sub>2a</sub> , κ | FITC               |
|               |                     | CD14              | mouse             | rmC5-3         | BD biosciences     | Rat IgG1, κ               | BV711              |
|               |                     | CD62-L            | mouse             | MEL-14         | BD biosciences     | Rat IgG <sub>2a</sub> , κ | BV711              |
|               |                     | CD44              | mouse             | IM7            | BD biosciences     | Rat IgG <sub>2b</sub> , κ | BV711              |
|               |                     | CD274             | mouse             | MIH5           | BD biosciences     | Rat IgG <sub>2a</sub> , I | BV711              |
| <b>Bovine</b> | <b>Primary Ab</b>   | Granulocytes      | bovine            | CH138A         | KingFisher Biotech | Mouse IgM                 | -                  |
|               |                     | MHC-II            | feline            | CAT82A         | KingFisher Biotech | Mouse IgG <sub>1</sub>    | -                  |
|               |                     | CD14              | bovine            | CC-G33         | Bio-Rad            | Mouse IgG <sub>1</sub>    | -                  |
|               |                     | CD62L             | bovine            | FMC46          | OriGene            | Mouse IgG <sub>2b</sub>   | -                  |
|               |                     | CD11b (hybridoma) | bovine            | AFRC IAH CC104 | See acknowledgment | Mouse IgG <sub>2b</sub>   | -                  |
|               | <b>Secondary Ab</b> | IgM               | mouse             | -              | Invitrogen         | Goat IgG                  | Alexa Fluor 647    |
|               |                     | IgG <sub>1</sub>  | mouse             | -              | Invitrogen         | Goat IgG                  | Alexa Fluor 488    |
|               |                     | IgG <sub>2b</sub> | mouse             | RMG2b-1        | BioLegend          | Rat IgG <sub>1</sub> , κ  | Phycoerythrin (PE) |
|               |                     | Viability dye     | -                 | -              | eBiosciences       | -                         | eFluor780          |
|               |                     | Annexin V         | Mouse, bovine     | -              | BD biosciences     | -                         | Biotin or FITC     |
|               | Streptavidin        | -                 | -                 | BD Biosciences | -                  | APC-Cy7                   |                    |

785

786 **Supplementary Table S1. Antibodies used in the study**

787 The specificity, origin, clone number and commercial provenance of all antibodies used in the  
788 study are listed.

789

| Species | Gene         | Forward                  | Reverse                  |
|---------|--------------|--------------------------|--------------------------|
| mouse   | arginase-1   | TAGAGAAAGGCCCTGCAGCA     | TCAACAAAGGCCAGGTCCCC     |
| mouse   | caspase-4    | ACAACCCACATCACTTGTCT     | TCGTCAAGTTGCCCGATCA      |
| mouse   | caspase-8    | ACCCTCCAGCTCTGTGG        | ATCCTCAGGAGGCACCTTGC     |
| mouse   | catalase     | AGATTGCCTTCCGGGTGG       | CCCAGTGTCCGACATGTG       |
| mouse   | cathepsin-G  | AATGTGCGCAATCGCTTCC      | GAATCACCCCTGAAGGCAGAC    |
| mouse   | ccl-20       | CTTCTCCAGAGCTATTGTGG     | TCATCCATTGGACAAAGTCCACTG |
| mouse   | ccl-5        | TCTCTGCAGCTGCCCTCACC     | TCTTGAACCCACTTCTCTC      |
| mouse   | ccr-1        | CTCTGAAACACAGACTCACTGTG  | TTGGCATGGAGTGGAGTCCC     |
| mouse   | cd14         | AAGCCCGTGAACCTGGAAG      | CACGCTCCATGGTCGGTAGA     |
| mouse   | cd-209a      | ACAGTCAAGTCCCTTGGCA      | AGTCGATCTACGCCAGCCTTC    |
| mouse   | clec-7a      | GGGGATCAGAGAAGGAAGCCA    | CAGCACTGCAGCAACCCTAC     |
| mouse   | cxcl-1       | CGCTCGTCTCTGTGACG        | GTGGCTATGACTTCGGTTGG     |
| mouse   | cxcl-10      | CACGTGTGAGATCATTGCCA     | GGGTGGCTTCACTCCAGTTA     |
| mouse   | cxcl-2       | GCTGTGCCACCAACCACC       | TGAGAGTGGCTATGACTTCTG    |
| mouse   | cxcl-5       | CCCTACGGTGAAGTCATAGCTAAA | GCCGTTCTTCCACTGCGGAG     |
| mouse   | cxcr-1       | CCAGTGGTGCCTCAGATCAA     | TGGGAGCATTCCCGTGATA      |
| mouse   | cxcr-2       | TCAACAGCCCTGACAGCTC      | ACTTAATCCTGCAGTAGTCTACGA |
| mouse   | elane        | TCAGCAGCCACTGTGTGAA      | AGAAGTCTGTGAGTGC         |
| mouse   | gm-csf       | TGCAGACCCGCTGAAGATA      | GGCCTGGGCTTCTCATT        |
| mouse   | hprt-1       | CAGTCCCAGCGTCGTGATTA     | TGGCTCCCATCTCCTTCAT      |
| mouse   | ifn-b        | AGAGTTACACTGCCTTGGCCTC   | ACTGTCTGCTGGTGGAGTTCATC  |
| mouse   | ifng r       | GAGGATCCTGAGCCTCCCT      | TACGAGCAGGAGAGCTGTT      |
| mouse   | il-10        | ATGCTGCCTGCTTACTGAC      | CTGGGGCCTCACTTACCAG      |
| mouse   | il12p40      | CTCACATCTGCTGCTCCACAA    | GACGCCATTCCACATGCACT     |
| mouse   | il-18        | CTTCTCCCTGTGGTGTGCT      | TGCCAGTGTGAGTGGACT       |
| mouse   | il-1b        | TCTAATGCCTTCCCAGGGC      | GACCTGTCTGGCCGAGGAC      |
| mouse   | il-6         | GAGGATACCCTCCCAACAGACC   | AAGTGCATCATCGTTTCAACA    |
| mouse   | inos-2       | GCCACCTTGGTGAAGGACT      | ACGTTCTCCGTCTCTGCAGT     |
| mouse   | irf-3        | ATTCCTCCCTGGCTAGAGCAT    | ATCTGTGCTCCTGCCGTAG      |
| mouse   | irf7         | CACACAGGGTGTGCCCGAG      | TGTAACACAGGCTTGTCTCCT    |
| mouse   | itgam        | GCTCTCATCACTGCTGGCT      | GTTACTGAGTGGGGCTCT       |
| mouse   | ly-8g        | CCCTGCTGTATAGGCACCCC     | ATGCCTCCAGGGTCAAGAGC     |
| mouse   | mhc-ii       | GGAGCAAGATGTTGAGCGGC     | GCCTCGAGGCTCTTCTGAC      |
| mouse   | mmp9         | ACCACCACCACACACAA        | CTGCCTCACTCCTTCCCAG      |
| mouse   | mpo          | TGTCGGTGTCAAGTGGCTGT     | GGGGCTTCTGTGTTGTC        |
| mouse   | oas-1        | GGTCAAGGGCAAGGCACCA      | TCTCATGTGAACCTCGCACA     |
| mouse   | pdl-1        | GCAGGCTTACTGCTGCAT       | TGCGGTATGGGCAATTGACT     |
| mouse   | ppia         | GCTGGACCAACACAAACGG      | CCAAAGACCACATGCTTGCC     |
| mouse   | proteinase-3 | AGCAGGCATATGCTCGGAGA     | CCCCGCAGCAGTTTTGAAT      |
| mouse   | ptgs-2       | AGCCAGGCAGCAATCCTTG      | ACTGTGTTTGGGGTGGCTT      |
| mouse   | rpl-4        | GACCAGTGTGAGTCTGGG       | GTATCACTCTGCGGTGCCA      |
| mouse   | s100a8       | TCCTTTGTAAGCTCCGCTTCT    | CTTCTCCAGTTGAGACGGCA     |
| mouse   | s100a9       | GTGGAAGCACAGTTGGCAAC     | TGGGTTGTTCTCATGCACT      |
| mouse   | sod-1        | TGACTGCTGGAAAGGACGGT     | TGGACCACATTGTACGGCC      |
| mouse   | sod-2        | TGAGCCCTAAGGGTGGTGG      | ACGGCTGTCAAGTCTCTCT      |
| mouse   | tlr-2        | GCATCCGAATTGCATCACC      | CATCACACACCCAGAAGCA      |
| mouse   | tlr-4        | TTATCCAGGTGAAATTGAA AC   | GCCACATTGAGTCTTTAAGG     |
| mouse   | tnf-a        | ATGAGCACAGAAAGCATGATC    | TACAGCCTTGTCACTCAATT     |
| bovine  | actin-b      | ACGGGCAGGTCAACCATC       | AGCACCGTGTGGCGTAGAG      |
| bovine  | ahr          | GTGCAGAAAAGTCAAGCCA      | AACATCTGGTGGAAAGGCAG     |
| bovine  | arginase-2   | GATCTGGGCTGCCACCTTAA     | CCACTGAGCAGGAGTCACT      |
| bovine  | caspase-1    | CTCCACCTGGCAGGAATAC      | AGGAGCTGAAAAGGAGGGA      |
| bovine  | caspase 13   | TCCGGACATTCACAAACCGT     | ACCCAAATCCCCACGATT       |
| bovine  | caspase 8    | AATATTGGGGAGCAGCTGGG     | AGGCATCCTTATGGGTTCC      |
| bovine  | catalase     | AGATGGACACAGGCACATGA     | ACTGCCTCTCCATTTCGATT     |
| bovine  | cathepsin-G  | ATTTCCAGTCTCTGCCCTG      | TGCCCCAGAGAAGGAGAGTC     |
| bovine  | ccr1         | ATGTCTTTGTCCGGGAGAGG     | TCTGTGACAGGAAGGGGAA      |
| bovine  | cd14         | TCCACAGTCCAGCCGACAAAC    | AACGGCGCTAGACCATCAG      |
| bovine  | cd209        | CACCCTGCAGCACTACACAG     | TGAAGAAGCCAGTGAAGCG      |
| bovine  | clec4a       | GAAGTACCACCGTCTTGC       | CCTCTGAAGTATGCTGCGA      |
| bovine  | clec6a       | TACCTGGAAGCCGTTTGGTT     | CAAGTGAAGTCCCATGCCAA     |
| bovine  | clec7a       | AGGCAAGTGTCTCCAGC        | ACAACAAGTGGAGCCATCC      |
| bovine  | cxcl1        | CCAAACCGAAGTCATAGCC      | TCAGTTGGCCTAGCCTTGTTAGC  |
| bovine  | cxcl2        | GTGTCTAAACCCGCGCTC       | TCCAGATGGCCTTAGGAGTGG    |
| bovine  | cxcl8        | TGAAGCTGCAGTCTGTCAAG     | TTCTGCACCCACTTTCTTGG     |
| bovine  | cxcr1        | ACATGGTGGTGAAGTCTT       | CGTGGCGGTGAATTTCCAA      |
| bovine  | cxcr2        | ACAGGTGACAAAGCCAGAATC    | CGACCAATCCGGCTGTATAA     |
| bovine  | elane        | CGATTCTTCACTCCGTTGGG     | GCGCCGGATGATAGAGTTGA     |
| bovine  | fibr2        | AAAGCTGTGGTGAAGTCCCA     | TGAGTGTGCTGAGAGAAAG      |
| bovine  | gapdh        | GGCATCGTGGAGGACTATG      | GCCAGTGGCTTCCCGTTGAG     |
| bovine  | hif1         | ACCCTGCACCTAACCAAGAA     | TGGGACTGTAGGCTCAGGT      |
| bovine  | hif2         | CCGTGAGAAGTGTAGCCTCA     | GACCGTGCACCTCATCCTCA     |
| bovine  | ifnar1       | TCCTTTGCCACGTGTCAAGT     | AGTAGCGTGAGGAGACAGA      |
| bovine  | ifngr1       | ACCCAAATCCTTGTCTGTG      | TGTGACGGCTGAAATGTGTC     |
| bovine  | ikzf1        | GCCTGTGAAGTGAATGGGGA     | CCTTGTGCTTGGACACTG       |
| bovine  | il1b         | CTCTCACAGGAAATGAACCGAG   | GCTGCAGGGTGGCGTATCACC    |
| bovine  | inos         | CTTGAGCGAGTGGTGGATGG     | ATCTGAGGGCTGGCATAGGG     |
| bovine  | irf3         | GGAAGGATAAGCCGACCTG      | GAGTCTTGTGTGGTCTCTC      |
| bovine  | irf7         | AAGTCTACTGGGAGTGGGG      | CCGAAGTCAAGATGGGCGT      |
| bovine  | itgam        | TTGAGGCGACGATGGAATTC     | ACTTTACCTGCCAGCAAT       |
| bovine  | mmp9         | CGTTCCGACGACATGCTCTG     | CATTGCCCTCTGGGTGTAG      |
| bovine  | mpo          | AATGACCCCGCATCAAGAA      | CGTTGATGCTGTTGCGGATG     |
| bovine  | ncf1         | GCAGGACCTGTCTGAGAAGG     | GATGTCCCCGCTCAATAG       |
| bovine  | nlrp3        | CTCAGTGGCAATACCCTGGG     | AGCACTGTCCCAACCAAT       |
| bovine  | oas1         | CCAATGGTCTTCTGCCCT       | GGCAGGAGGTGCTTTGAT       |
| bovine  | ppia         | TCCGGGATTTATGTGCCAGGG    | GCTTGCATCCAAACCCTCAG     |
| bovine  | ptgs2 (cox2) | CATGGGTGTAAGGGAGGAA      | ATTTGTCCCTGGGATCAG       |
| bovine  | proteinase-3 | CAGGAGCTCAATGTACCCGT     | CGGAGTCCCAAGCAGATG       |
| bovine  | ptx3         | TGCCTGCATTTGGGTCAAAG     | CACGTTCTAGGGAATCAC       |
| bovine  | s100a8       | CTCCCTGATTGACGTCTACC     | TCCAGGCCACCTTTATCAC      |
| bovine  | s100a9       | TGACACCCTGATCCAGAAG      | GCCACCAGCATAATGAATC      |
| bovine  | sod2         | GCAATTCCTTGGGGTCT        | CAGCCTGCGTTGAAGTTCAA     |
| bovine  | spi1         | CACCCCGACATCTGATCTG      | AAGCGTCAACCATCTGAGG      |
| bovine  | tlr2         | ACTGGGTGGAGAACCCTATGGTCC | ATCTTCCGACGCTACAGAAGC    |
| bovine  | tlr4         | GCATGGAGCTGAATCTCTAC     | CAGGCTAAACTCTGGATAGG     |
| bovine  | zbtb11       | CGTCCGAAGGACTCACTGT      | GGCAGGAAAGGAAGCAGAG      |

790

791 **Supplementary Table S2. Sequences of primers used in this study.**

792 Primers were designed using Geneious software, in intron-spanning regions when possible.

793 The annealing temperature was set at 60 and 62°C for bovine and mouse samples

794 respectively. Housekeeping genes used as the reference to calculate  $\Delta$ CT for each species

795 are indicated in the yellow boxes and weakly expressed genes that were removed from the

796 Principal Component Analysis presented in Fig 4 are indicated in the grey boxes.

797

798

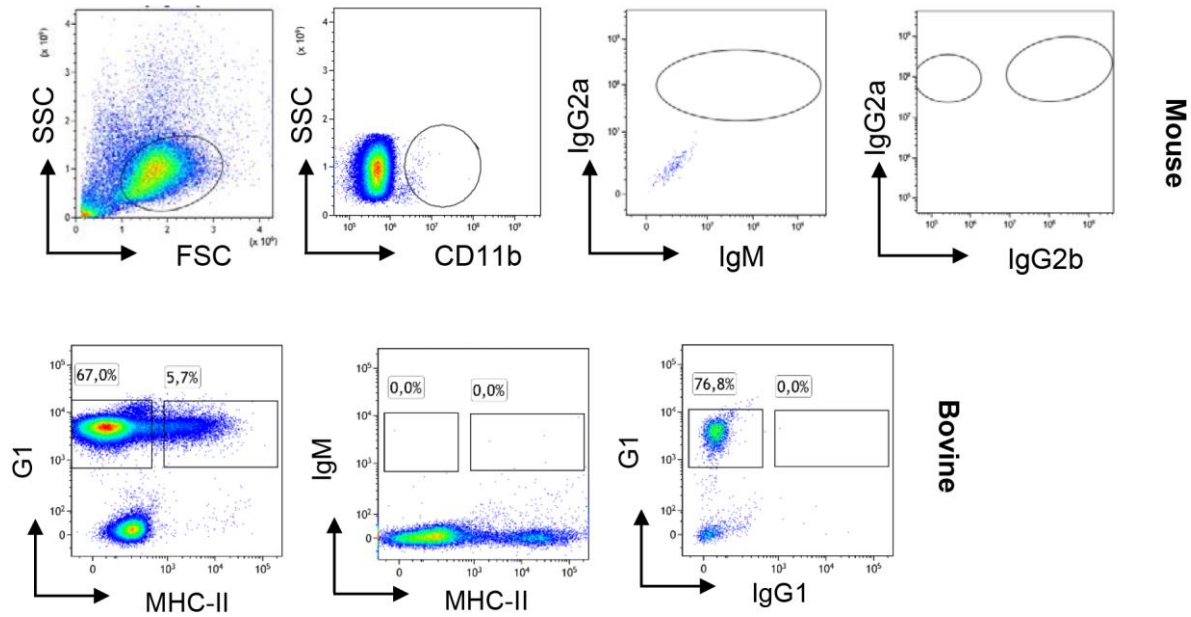

799

800 **Supplementary Figure S1. Isotype controls for neutrophil diversity analysis in mouse**  
801 **bone marrow and cattle blood**

802 Mouse and bovine neutrophils were labelled as described in Fig. 2. Similar procedures were  
803 set up with isotype controls for all antibodies in each experiment to correctly set the analysis  
804 and sorting gates. Dot plots from one representative animal are depicted (3 independent  
805 experiments, n=4 mice, n=6 for bovine).

806

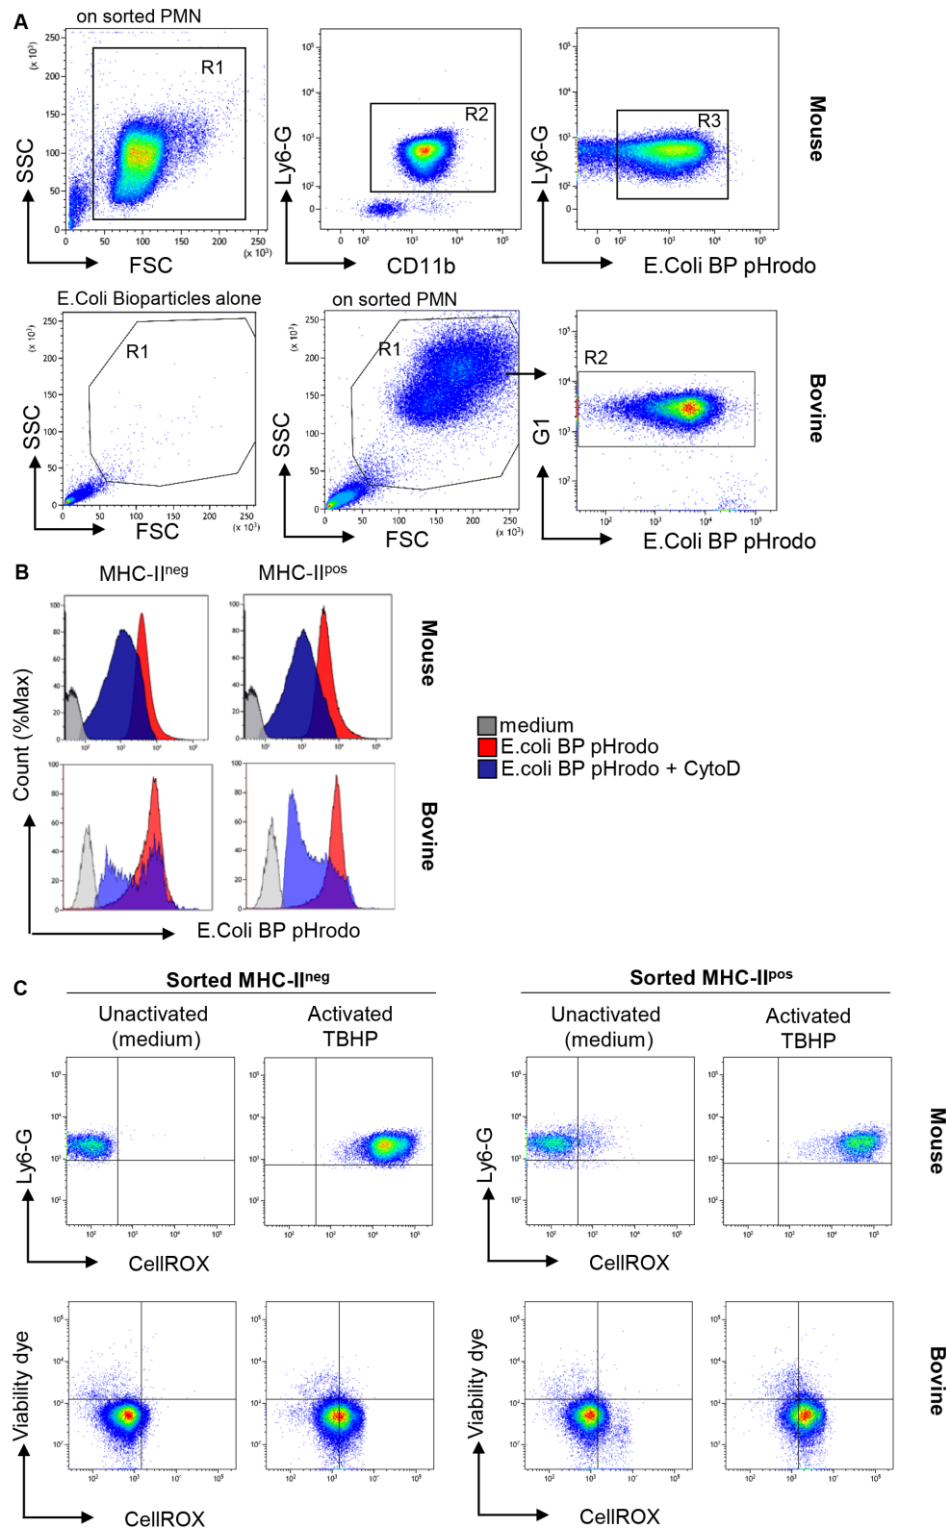

807

808 **Supplementary Figure S2. Gating strategy for analysis of phagocytosis and ROS**  
 809 **production by neutrophils**

810 Neutrophils were labelled and sorted as described in Fig. 2 and S1. **(A)** After purification by  
 811 cell sorting from the BM (mouse) or blood (bovine) phagocytosis by MHC-II<sup>pos</sup> or MHC-II<sup>neg</sup>  
 812 neutrophils was assessed using pHrodo E.coli bioparticles with or without previous treatment  
 813 with cytochalasin D. Dot plots from one representative animal are depicted (3 independent



814 experiments, n=3 pool of 10 mice, n=3 for bovine). **(B)** Oxidative stress was measured in MHC-  
 815  $II^{pos}$  and MHC- $II^{neg}$  sorted neutrophils using the CellROX Orange probe that reacts with all ROS  
 816 species. Cells were activated with TBHP or incubated with medium alone and levels of ROS  
 817 were measured by flow cytometry among the live cells (unstained with eFluor780 viability dye).  
 818 Dot plots from one representative animal are depicted (3 and 4 independent experiments for  
 819 mice and cattle respectively, n=3 pool of 10 mice, n=5 for bovine).  
 820

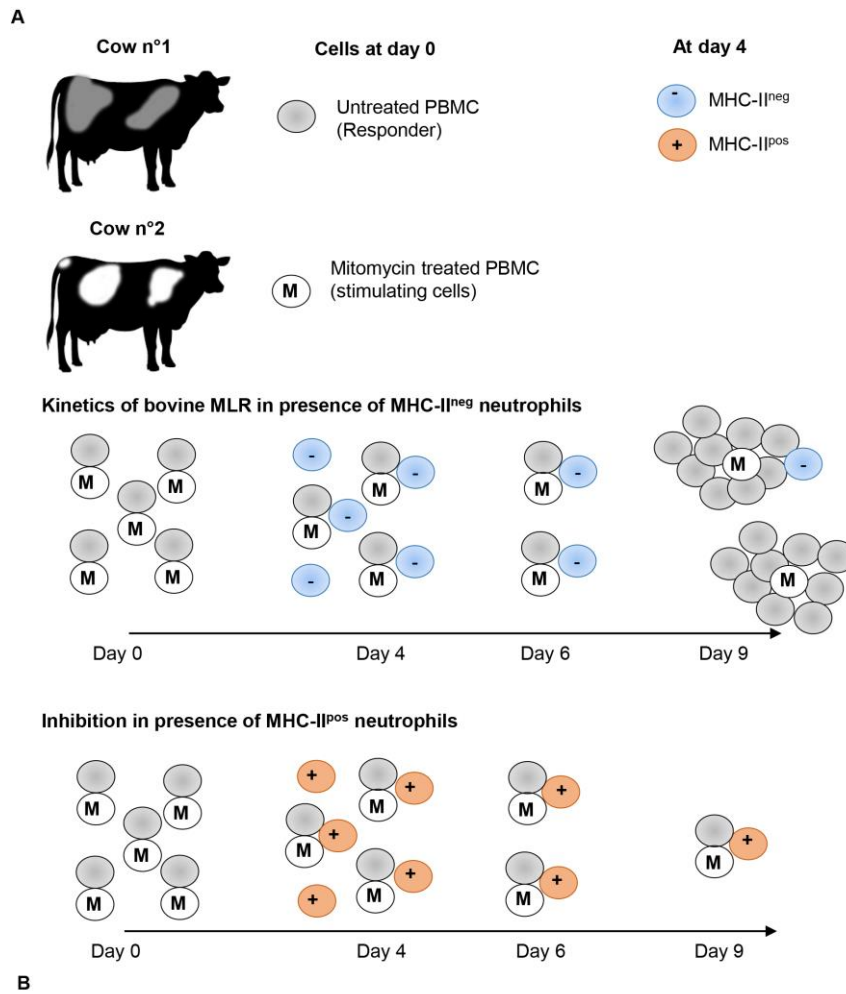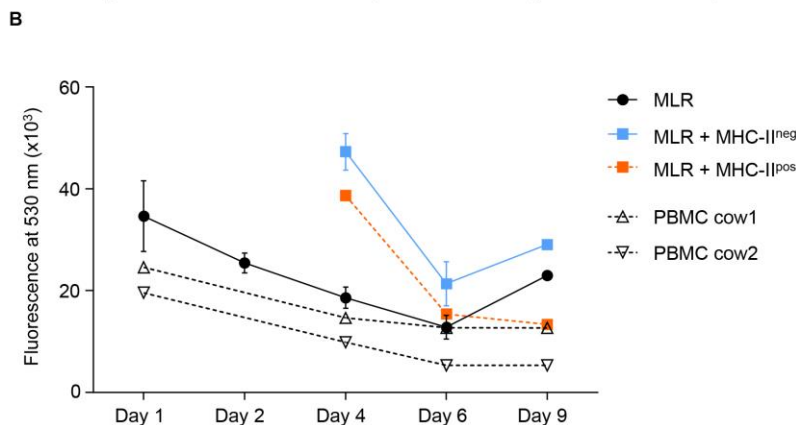

821  
 822 **Supplementary Figure S3. Kinetics of bovine Mixed Leukocyte Reaction and analysis of**  
 823 **neutrophil suppressive activity**

824 **(A)** PBMCs from the responder animal were isolated and left untreated, while PBMCs from the  
825 stimulating animal were incubated with mitomycin C to block their proliferation. PBMCs from  
826 the two cows were incubated at ratio of 1:1. Sorted MHC-II<sup>pos</sup> or MHC-II<sup>neg</sup> neutrophils from the  
827 responder animal were added to the reaction at day 4. **(B)** DNA was quantified at different time  
828 points with CyQUANT Cell Proliferation Assay tests according to manufacturer's instruction  
829 and fluorescence was read at 530nm. DNA extracted from PBMCs cultivated separately  
830 decreased along the assay indicated the absence of proliferation (dotted lines). In the MLR  
831 reaction, while DNA content declined between day 1 and 6, PBMCs proliferation could be  
832 measured between day 6 and 9 (black). The effect of adding sorted MHC-II<sup>neg</sup> neutrophils  
833 (blue) or MHC-II<sup>pos</sup> neutrophils (orange) to the proliferating cells could then be measured. One  
834 representative experiment is shown and data represent the mean  $\pm$  SEM of technical  
835 triplicates. Four independent experiments were conducted with different pairs of cows.
